# Supplementary material for: Whole-Genome Sequencing of 84 Japanese Eels Reveals Evidence against Panmixia and Support for Sympatric Speciation
Source: PubMed Central journal article supplement (PMC6210723; doi:10.3390/genes9100474), 2018-09-28
Supplement: genes-09-00474-s001.pdf [file genes-09-00474-s001.pdf]

Supplementary Materials for

Article

# Whole-genome sequencing of 84 Japanese eels reveals evidence against panmixia and support for sympatric speciation

Yoji Igarashi <sup>1</sup>, Hong Zhang<sup>1</sup>, Engkong Tan <sup>1</sup>, Masashi Sekino<sup>2</sup>, Kazutoshi Yoshitake <sup>1</sup>, Shigeharu Kinoshita <sup>1</sup>, Susumu Mitsuyama <sup>1</sup>, Tatsuki Yoshinaga <sup>3</sup>, Seinen Chow <sup>2</sup>, Hiroaki Kurogi <sup>4</sup>, Akira Shinoda <sup>5</sup>, Yu-San Han <sup>6</sup>, Ryoshiro Wakiya <sup>7</sup>, Noritaka Mochioka <sup>7</sup>, Toshihiro Yamamoto <sup>4</sup>, Hiroshi Kuwada <sup>8</sup>, Yoshitsugu Kaji <sup>9</sup>, Yutaka Suzuki <sup>10</sup>, Takashi Gojobori <sup>11</sup>, Takanori Kobayashi <sup>2</sup>, Kenji Saitoh <sup>2</sup>, Shugo Watabe <sup>3</sup> and Shuichi Asakawa <sup>1,\*</sup>

<sup>1</sup> Department of Aquatic Bioscience, Graduate School of Agricultural and Life Sciences, The University of Tokyo, Bunkyo, Tokyo 113-8657, Japan; [aiga@mail.ecc.u-tokyo.ac.jp](mailto:aiga@mail.ecc.u-tokyo.ac.jp) (Y.I.); [schwarze.augen@aliyun.com](mailto:schwarze.augen@aliyun.com) (H.Z.); [tanengkong@gmail.com](mailto:tanengkong@gmail.com) (E.T.); [akyoshita@g.ecc.u-tokyo.ac.jp](mailto:akyoshita@g.ecc.u-tokyo.ac.jp) (K.Y.); [akino@mail.ecc.u-tokyo.ac.jp](mailto:akino@mail.ecc.u-tokyo.ac.jp) (S.K.); [a-mituya@mail.ecc.u-tokyo.ac.jp](mailto:a-mituya@mail.ecc.u-tokyo.ac.jp) (S.M.)

<sup>2</sup> National Research Institute of Fisheries Science, Japan Fisheries Research and Education Agency, Yokohama, Kanagawa 236-8648, Japan; [sekino@affrc.go.jp](mailto:sekino@affrc.go.jp) (M.S.); [chow@affrc.go.jp](mailto:chow@affrc.go.jp) (S.C.); [kobayash@fra.affrc.go.jp](mailto:kobayash@fra.affrc.go.jp) (T.K.)

<sup>3</sup> School of Marine Biosciences, Kitasato University, Sagamihara, Kanagawa 252-0373, Japan; [yosinaga@kitasato-u.ac.jp](mailto:yosinaga@kitasato-u.ac.jp) (T.Y.); [swatabe@kitasato-u.ac.jp](mailto:swatabe@kitasato-u.ac.jp) (S.W.)

<sup>4</sup> Yokosuka Laboratory, National Research Institute of Aquaculture, Japan Fisheries Research and Education Agency, Yokosuka, Kanagawa 238-0316, Japan; [hkuro@affrc.go.jp](mailto:hkuro@affrc.go.jp) (H.K.); [toshiy@affrc.go.jp](mailto:toshiy@affrc.go.jp) (T.Y.)

<sup>5</sup> Department of Biology, Tokyo Medical University, Tokyo 160-8402, Japan; [shinoda@tokyo-med.ac.jp](mailto:shinoda@tokyo-med.ac.jp)

<sup>6</sup> Institute of Fishery Science, College of Life Science, National Taiwan University, Taipei 10617, Taiwan; [yshan@ntu.edu.tw](mailto:yshan@ntu.edu.tw)

<sup>7</sup> Bioresource Sciences, Faculty of Agriculture, Kyushu University, Fukuoka 812-0053, Japan; [ryoshiro.wakiya@gmail.com](mailto:ryoshiro.wakiya@gmail.com) (R.W.); [mochioka@agr.kyushu-u.ac.jp](mailto:mochioka@agr.kyushu-u.ac.jp) (N.M.)

<sup>8</sup> Minami-Izu Laboratory, National Research Institute of Aquaculture, Japan Fisheries Research and Education Agency, Kamo, Shizuoka 415-0156, Japan

<sup>9</sup> Wakayama Prefectural Museum of Natural History, Kainan, Wakayama 642-0001, Japan; [kaji\\_y0001@pref.wakayama.lg.jp](mailto:kaji_y0001@pref.wakayama.lg.jp)

<sup>10</sup> Department of Medical Genome Science, Graduate School of Frontier Sciences, University of Tokyo, Kashiwa, Chiba 277-8561, Japan; [ysuzuki@k.u-tokyo.ac.jp](mailto:ysuzuki@k.u-tokyo.ac.jp)

<sup>11</sup> Center for Information Biology and DNA Data Bank of Japan, National Institute of Genetics, Mishima, Shizuoka 411-8540, Japan; [tgojobor@nig.ac.jp](mailto:tgojobor@nig.ac.jp)

† Present address: National Association for the Promotion of Productive Seas, Kodenmachi Matsumura Bldg, Nihonbashi Kodenmachi, Chuo, Tokyo 103-0001, Japan; [h.kuwada@yutakanaumi.jp](mailto:h.kuwada@yutakanaumi.jp)

‡ Present address: Tohoku National Fisheries Research Institute, Japan Fisheries Research and Education Agency, Shiogama, Miyagi 985-0001, Japan; [ksaitoh@affrc.go.jp](mailto:ksaitoh@affrc.go.jp)

\* Correspondence: [asakawa@mail.ecc.u-tokyo.ac.jp](mailto:asakawa@mail.ecc.u-tokyo.ac.jp); Tel.: +81-3-5841-5296



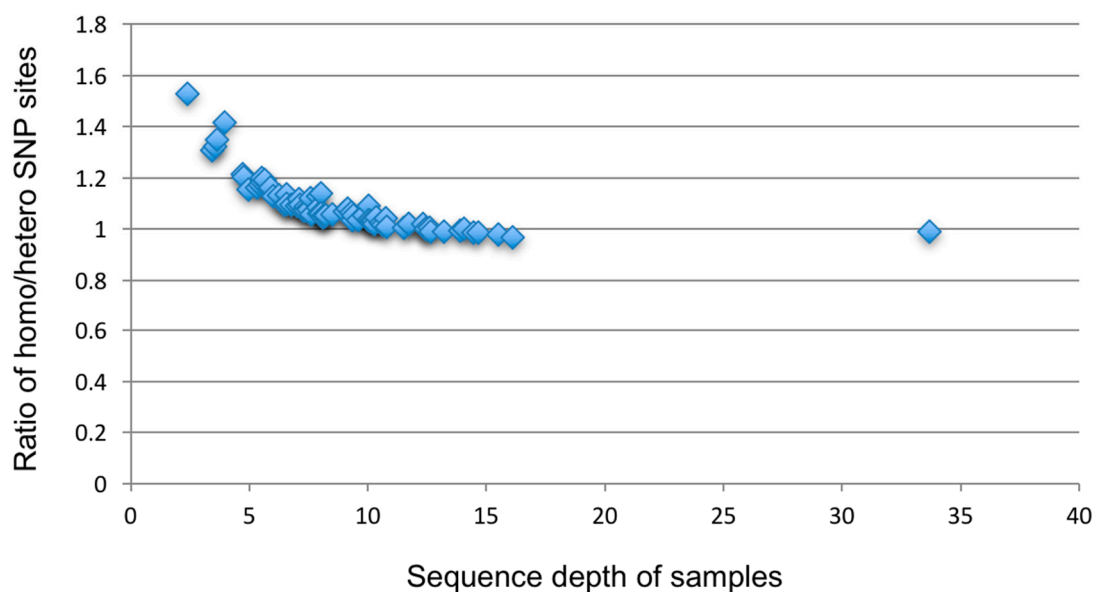

**Figure S2.** Plots of the ratio of average depth of coverage at SNP sites regarded as homozygous and heterozygous against the sequence depth of samples. To distinguish heterozygous SNPs from homozygous SNPs and determine the genotype exactly, sequences with greater depth are more accurate. If the depth is sufficient and the genotyping is accurate, the ratio is expected to converge to 1.

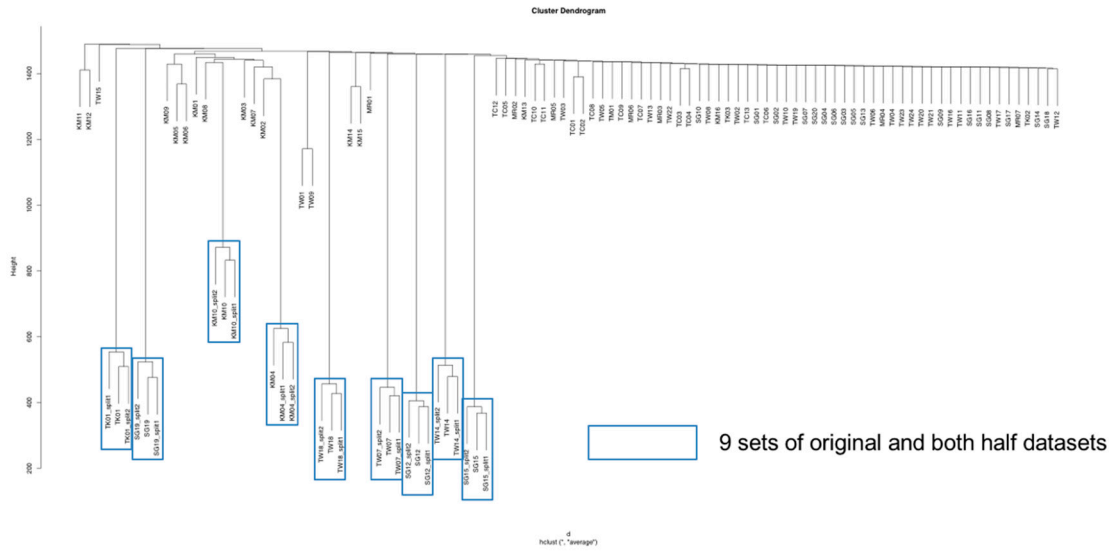

**Figure S3.** Cluster analysis using half of the raw data of 9 representative samples together with the 84 samples. Each half data of each sample (the depth of coverage are from 6.9 to 9.7) was independently processed. For all of 9 samples, each-half data and original full data formed a cluster with a closer exclusive relationship, indicating that sequences with a depth of 6.9 or more are sufficient.

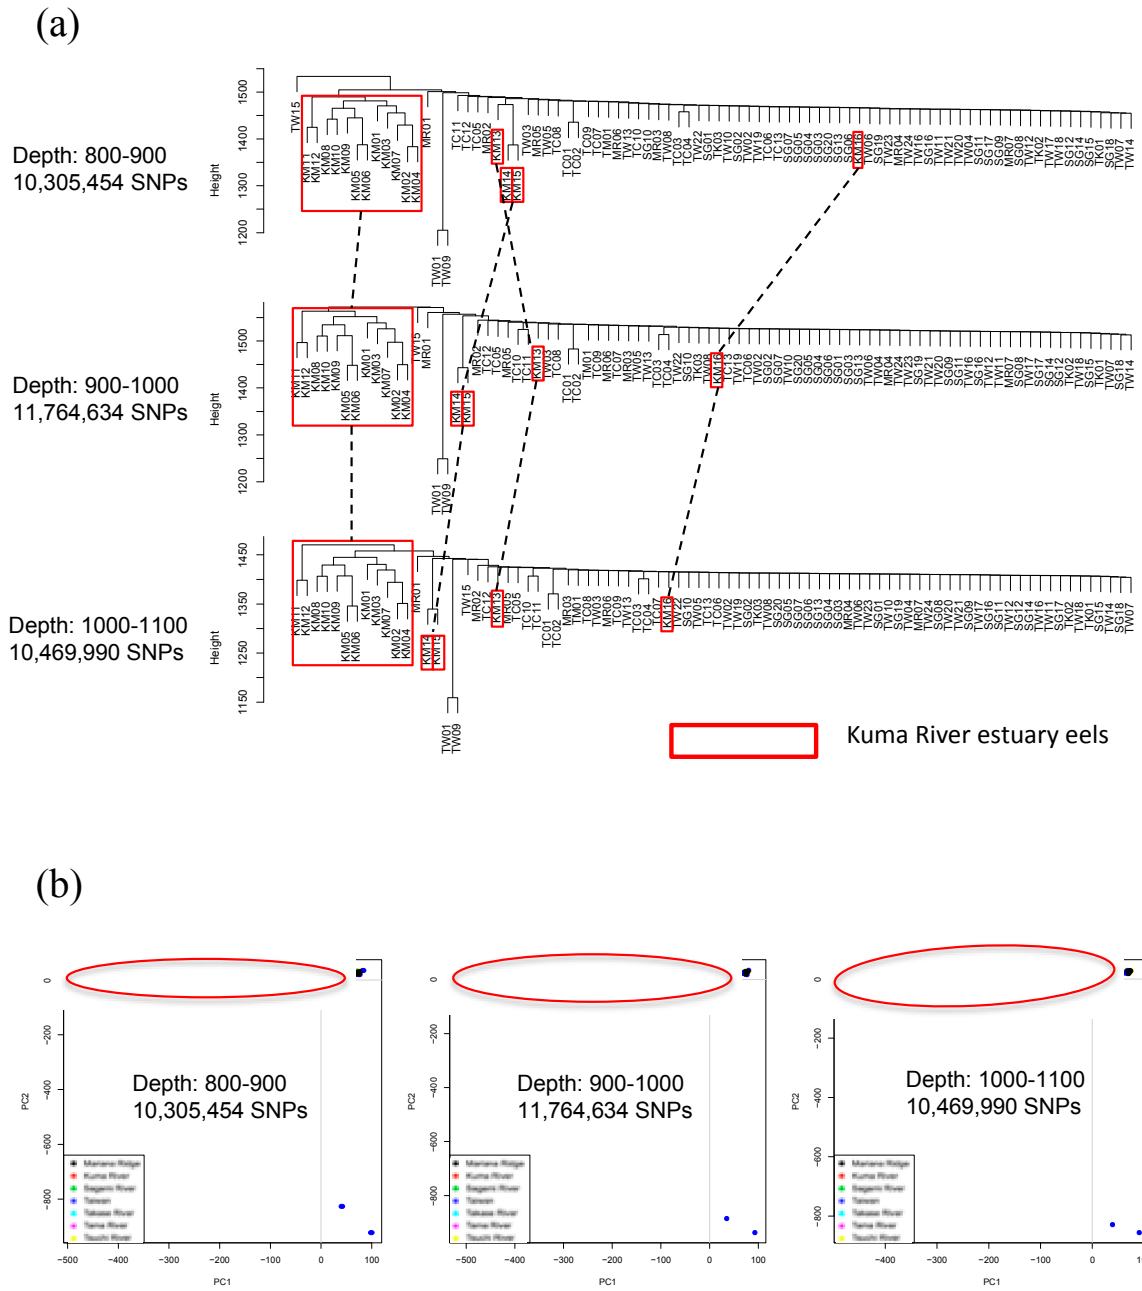

**Figure S4.** Genetic population analyses at 3 different sequence depths for the Japanese eel *Anguilla japonica* collected from different areas. (a) Cluster analysis and (b) PCA. The depth ranges of 800 to 900, 900 to 1000, and 1000 to 1100 include 10,305,454, 11,764,634, and 10,469,990 SNP sites, respectively.

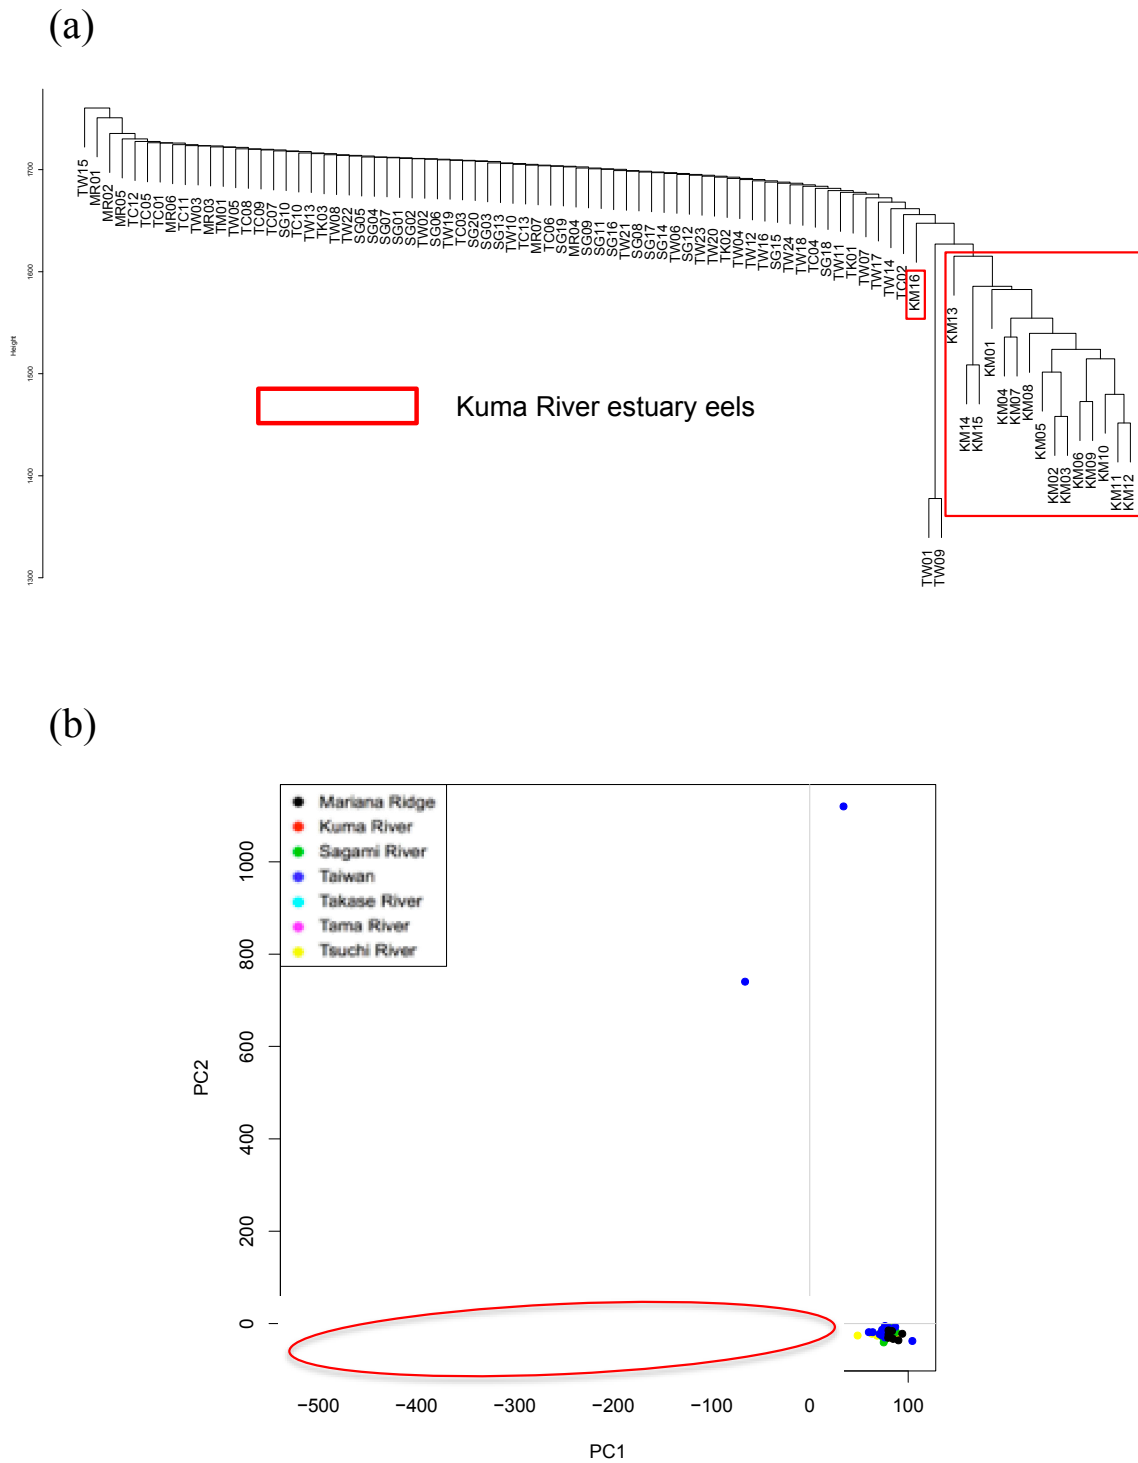

**Figure S5.** Genetic population analysis was based on 4,557,695 major SNPs that were present in 15 to 66 of the 84 samples. (a) Cluster analysis and (d) PCA were performed using the SNPs. This result confirmed that it was not just certain minor SNPs characterizing the samples.

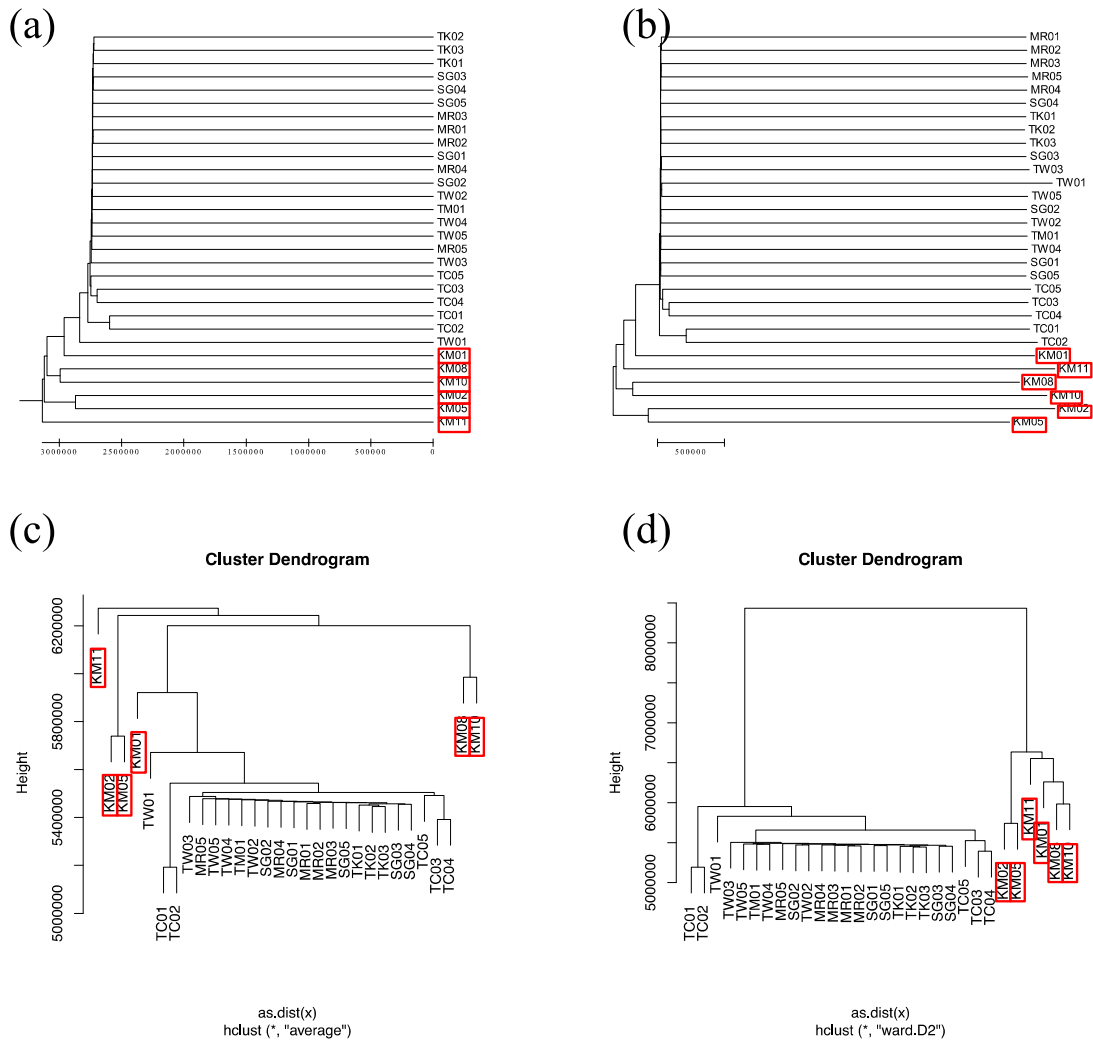

Kuma River estuary eels

**Figure S6.** Molecular phylogenetic tree based on calculated pairwise genetic distance. Molecular phylogenetic tree constructed by the unweighted pair group method using MEGA6 software (a), the neighbor-joining method using MEGA6 software (b), the group average method using R (c), and the ward method using R (d) based on a pairwise genetic distance of 30 Japanese eel *Anguilla japonica* individuals.

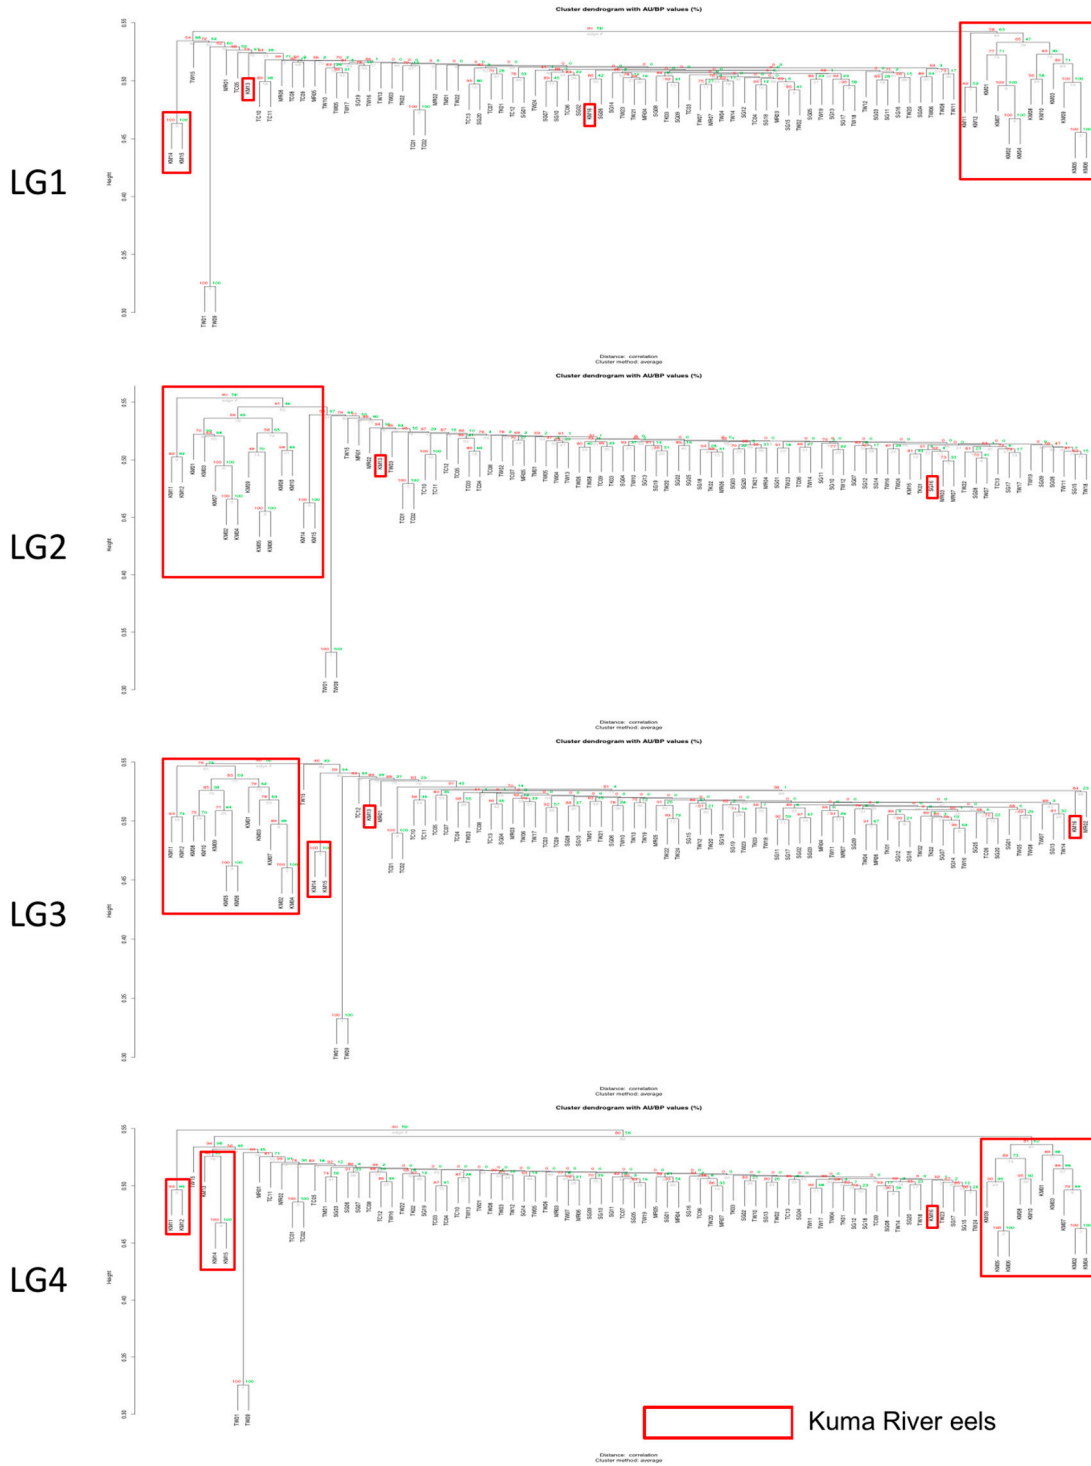

**Figure S7.** Genetic analysis of the 84 sampled Japanese eels *Anguilla japonica* based on SNP sites at different linkage groups of *A. japonica* ranged from 13,825 for LG17 (minimum) to 161,375 for LG9 (maximum). Results of the Cluster analyses and PCA using the SNP sites on each linkage group are shown.



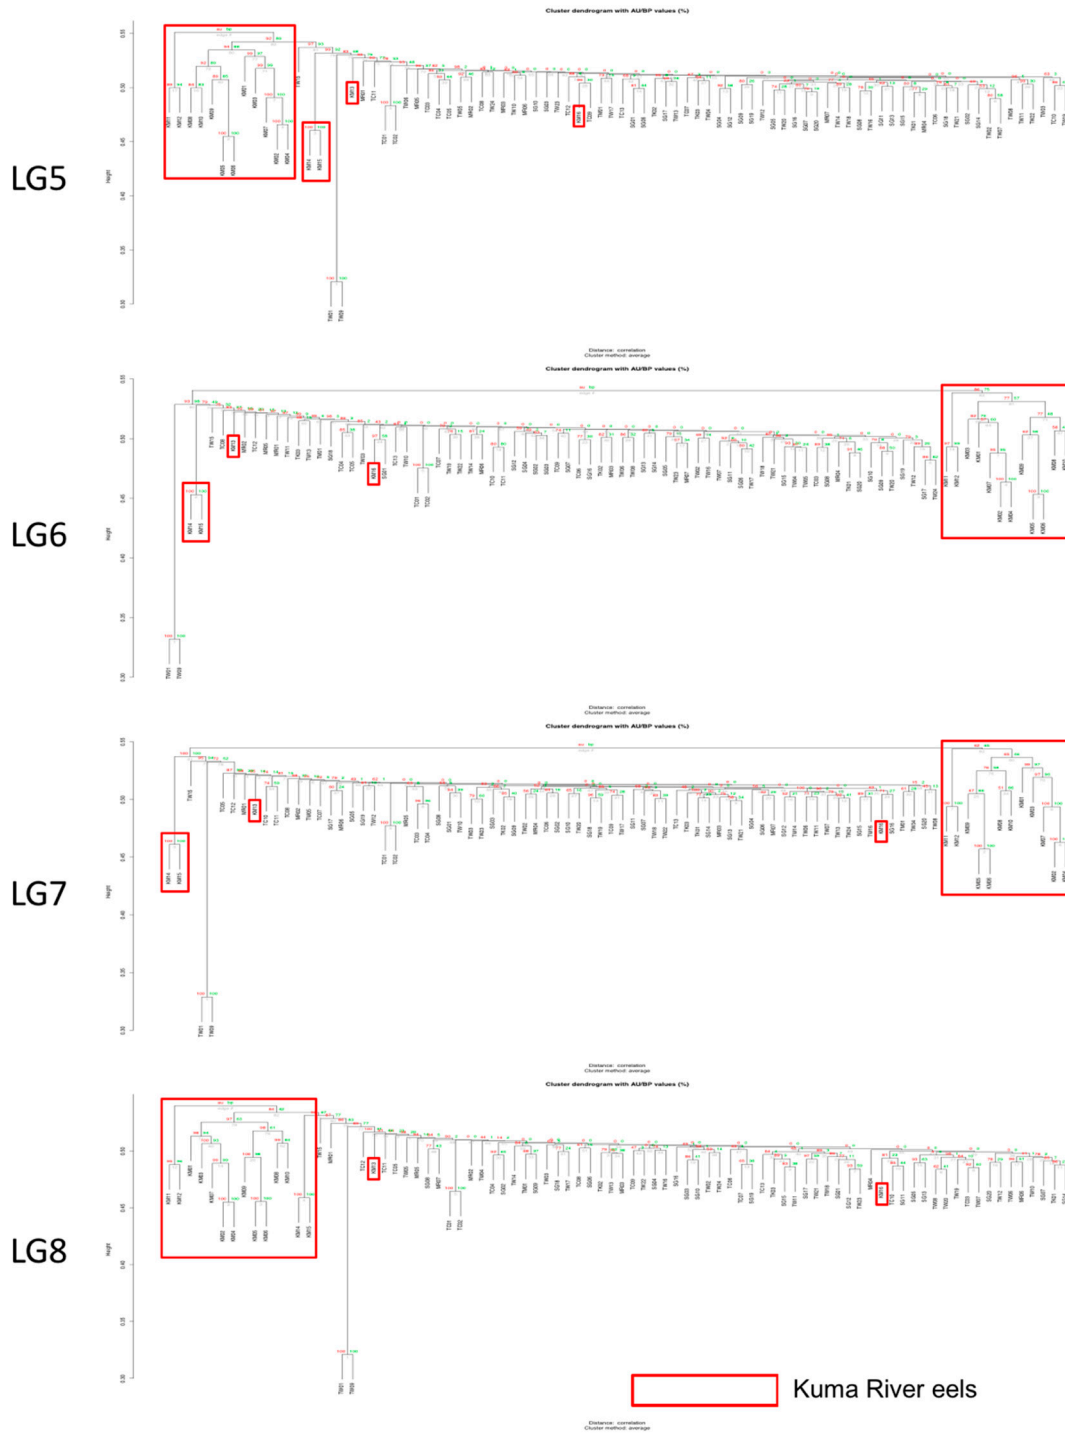

Figure S7. continued.

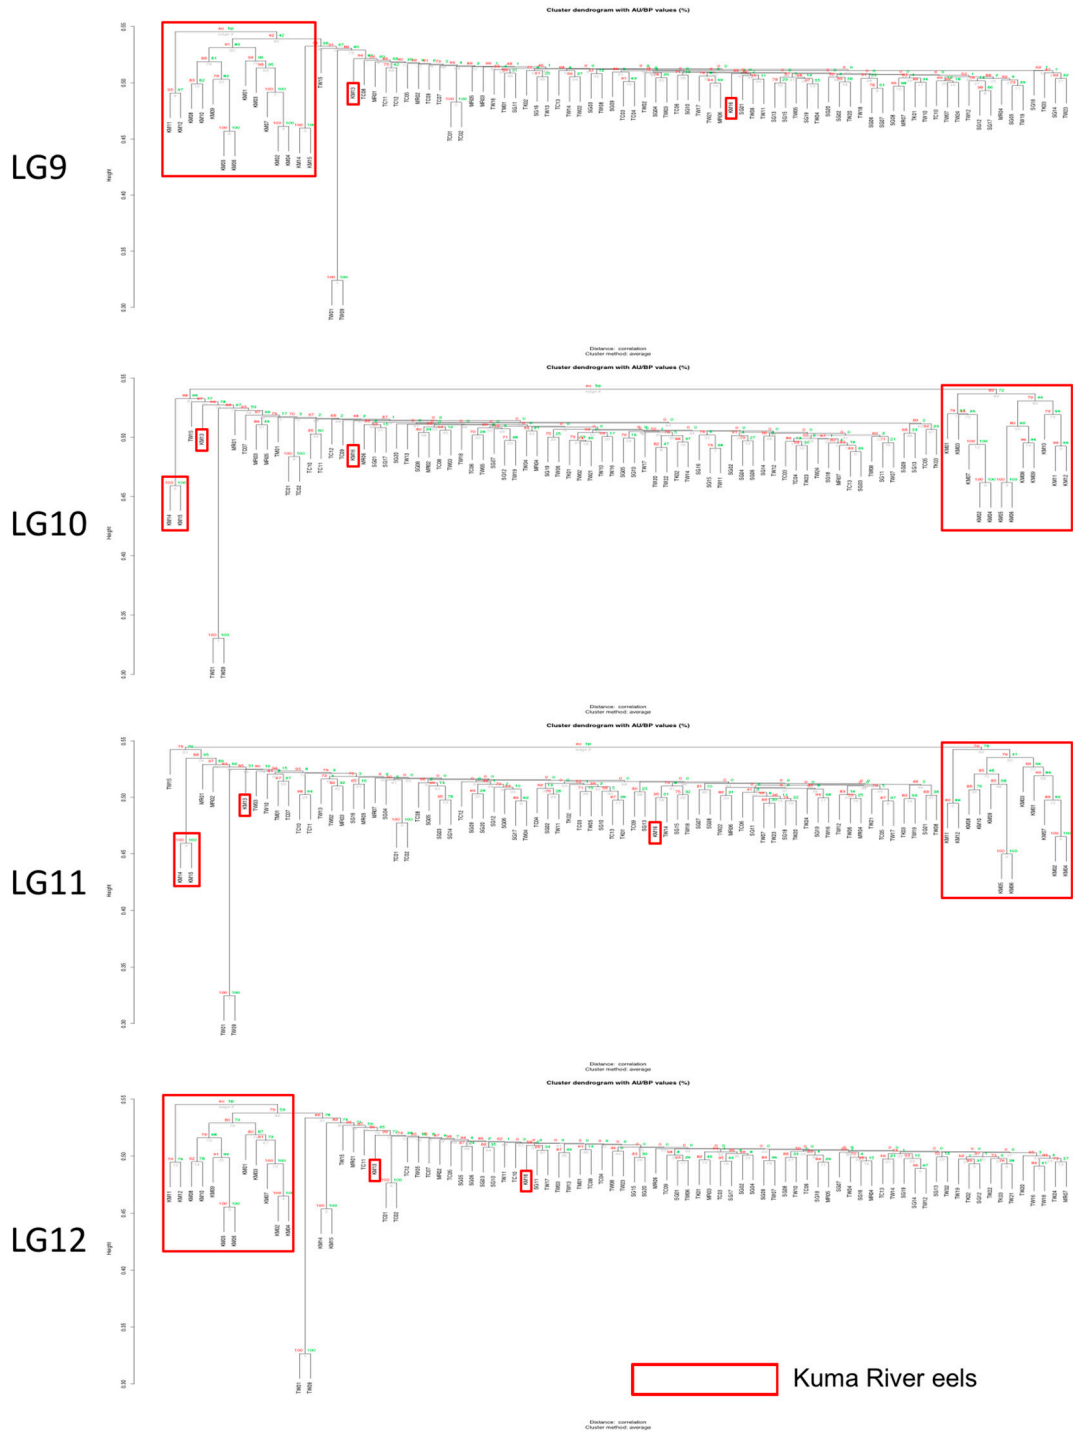

Figure S7. continued.

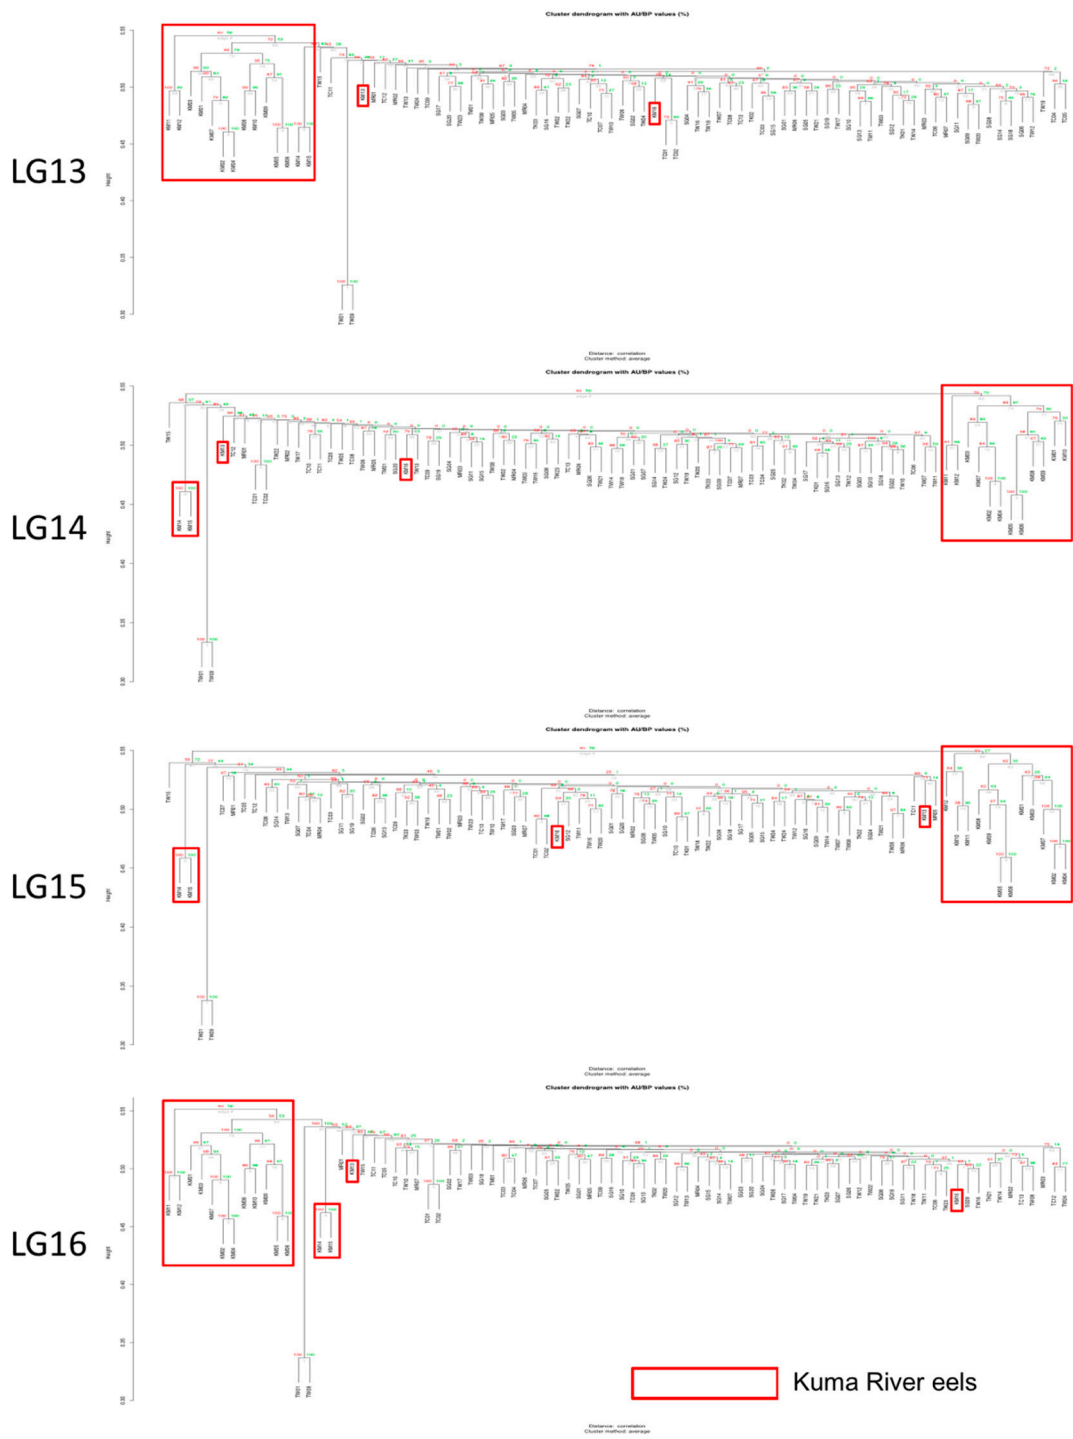

Figure S7. continued.

LG17

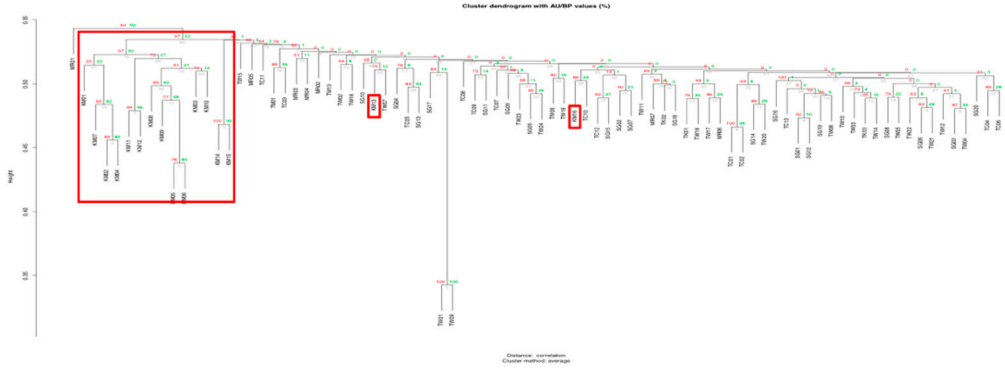

LG18

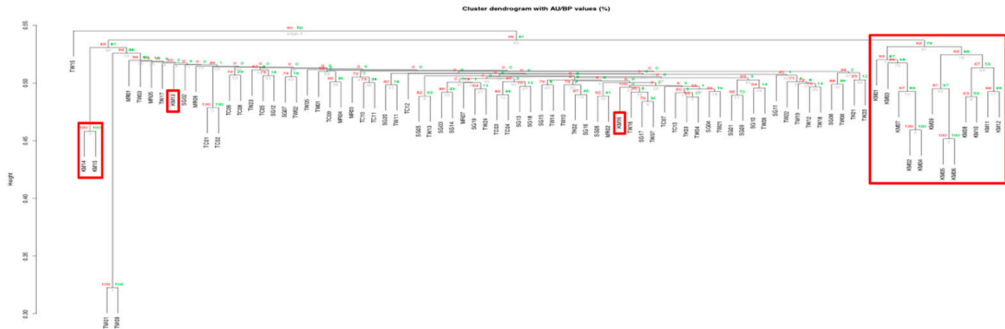

LG19

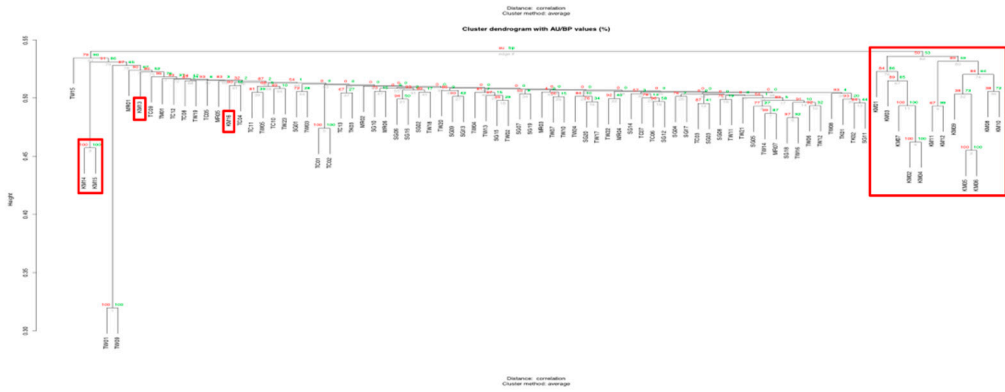

 Kuma River eels

Figure S7. continued.

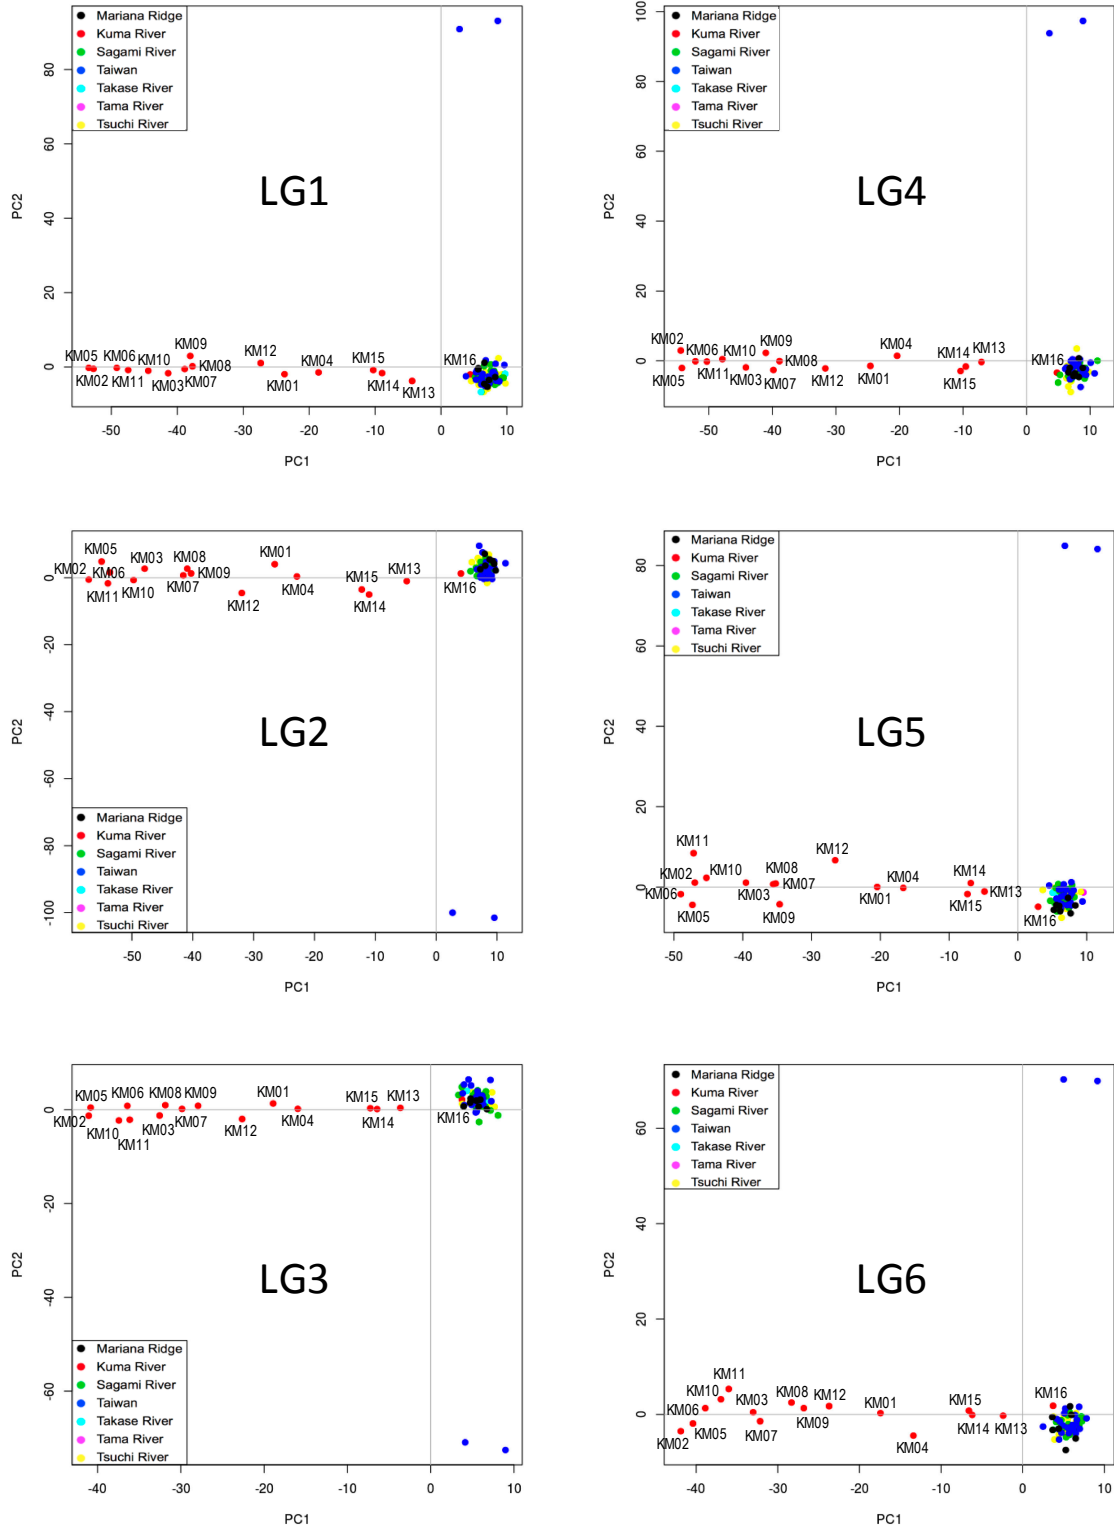

Figure S7. continued.

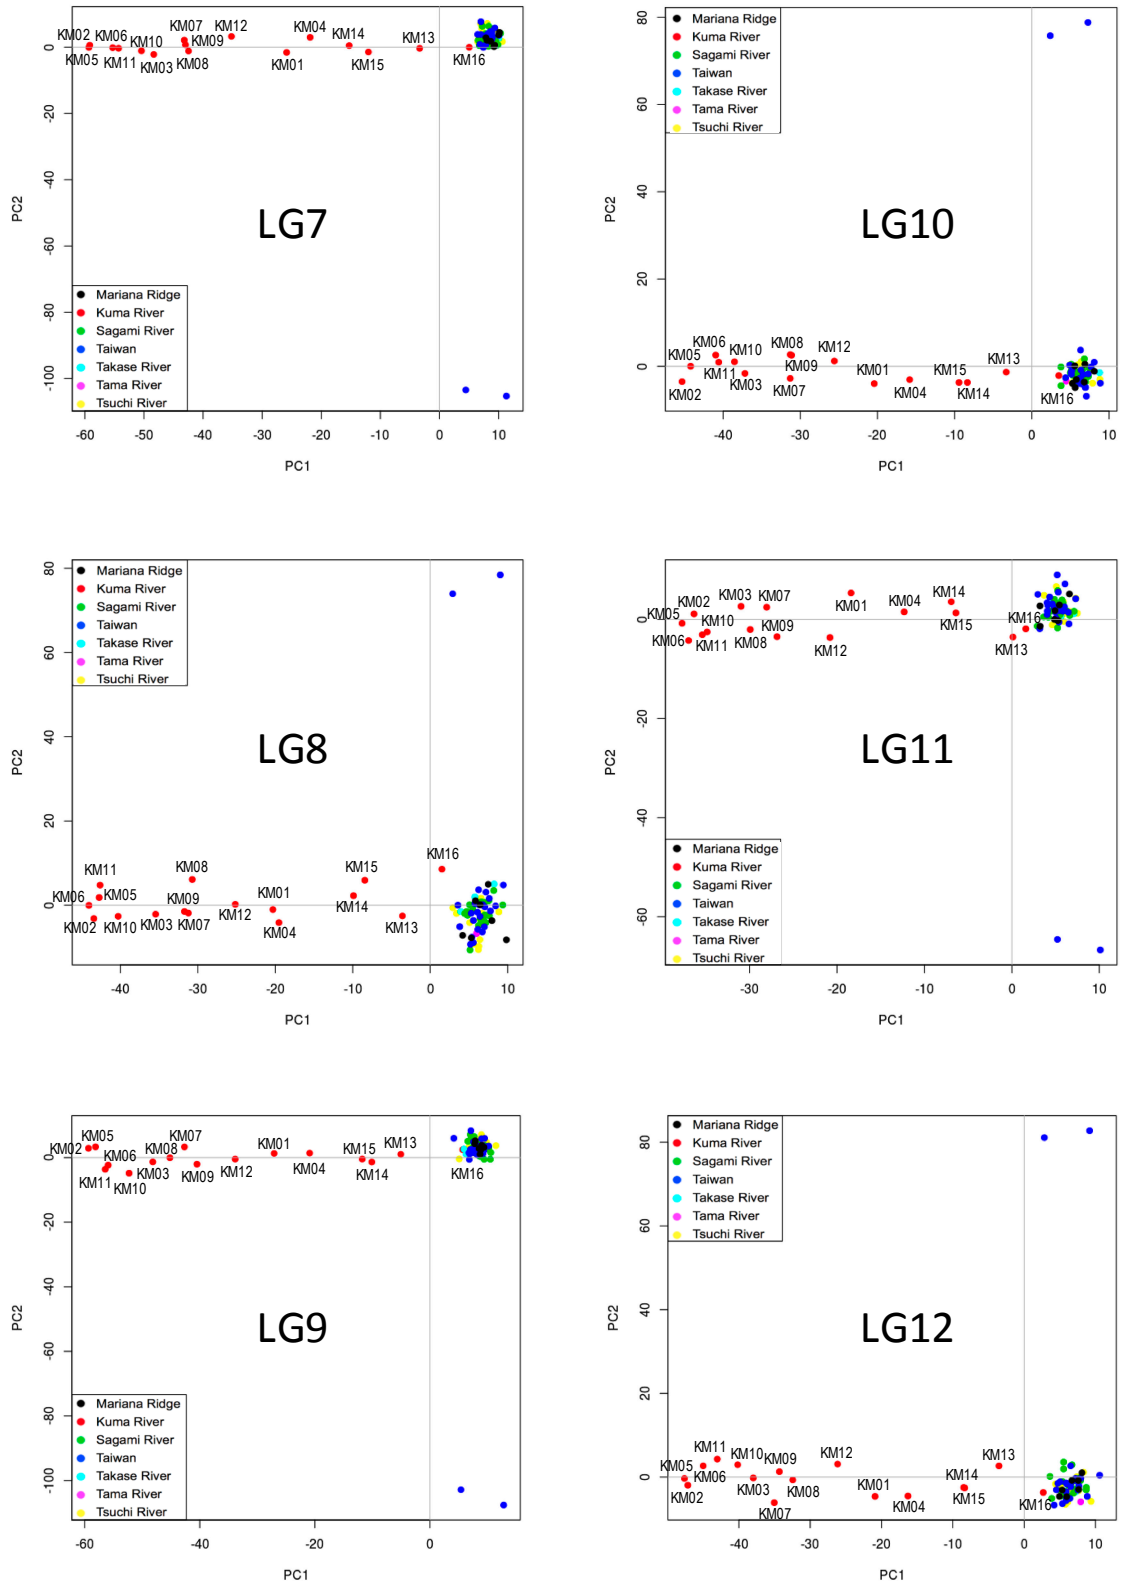

Figure S7. continued.

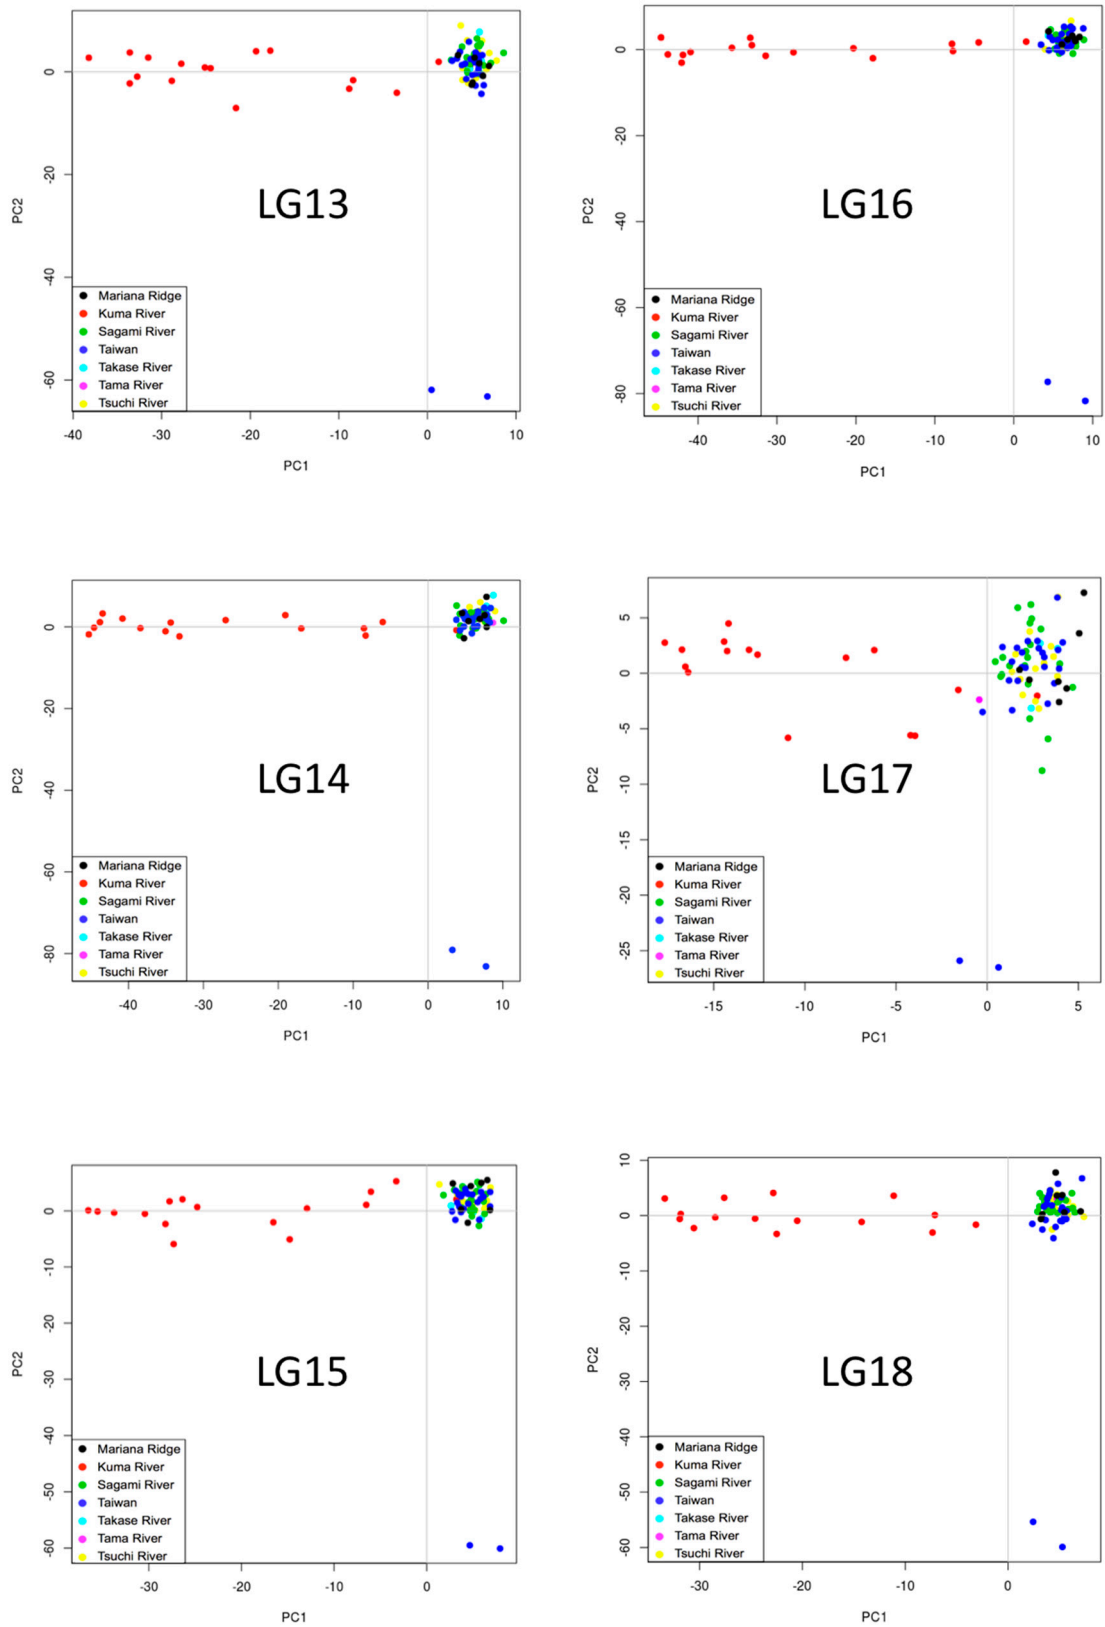

Figure S7. continued.

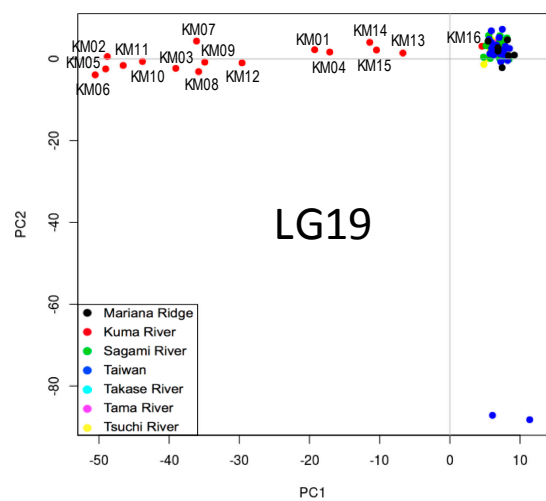

Figure S7. continued.



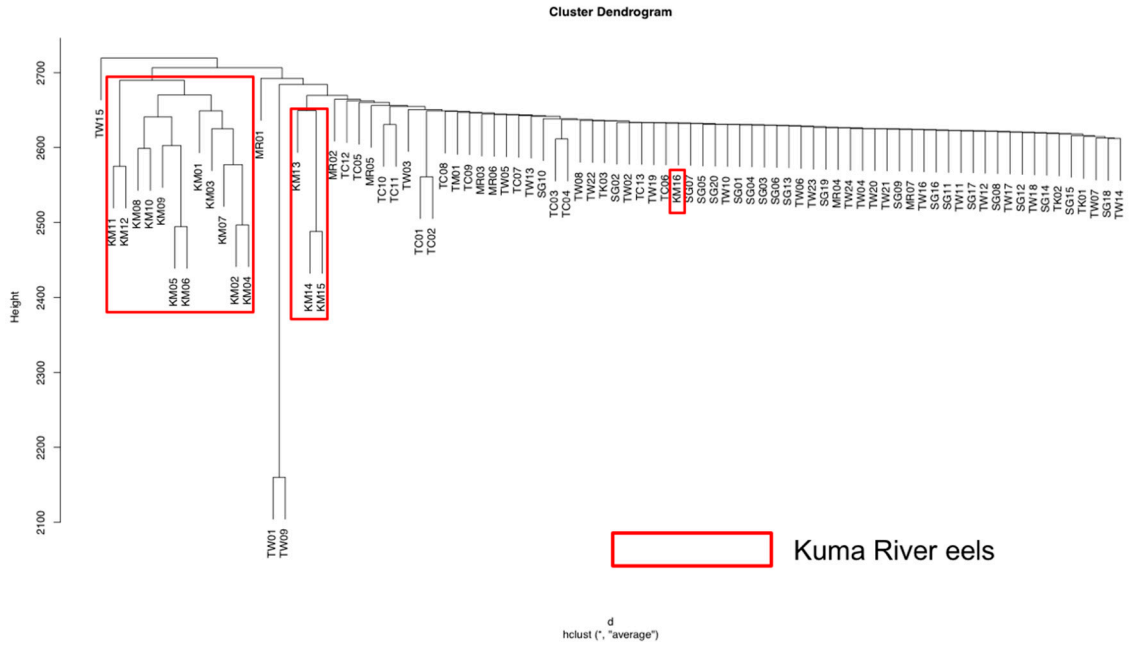

**Figure S8.** Cluster analysis of 84 Japanese eel *Anguilla japonica* individuals based on SNP sites extracted using another draft genome sequence of *A. japonica* assembled by ourselves as a reference (genome size: 1.16 Gb, number of scaffolds: 186743). A total of 34,587,126 SNP sites were detected using the same SNP filtering method (total sequencing depth 800-1100). The result was essentially the same as that obtained from the published reference genome in Figure 2.

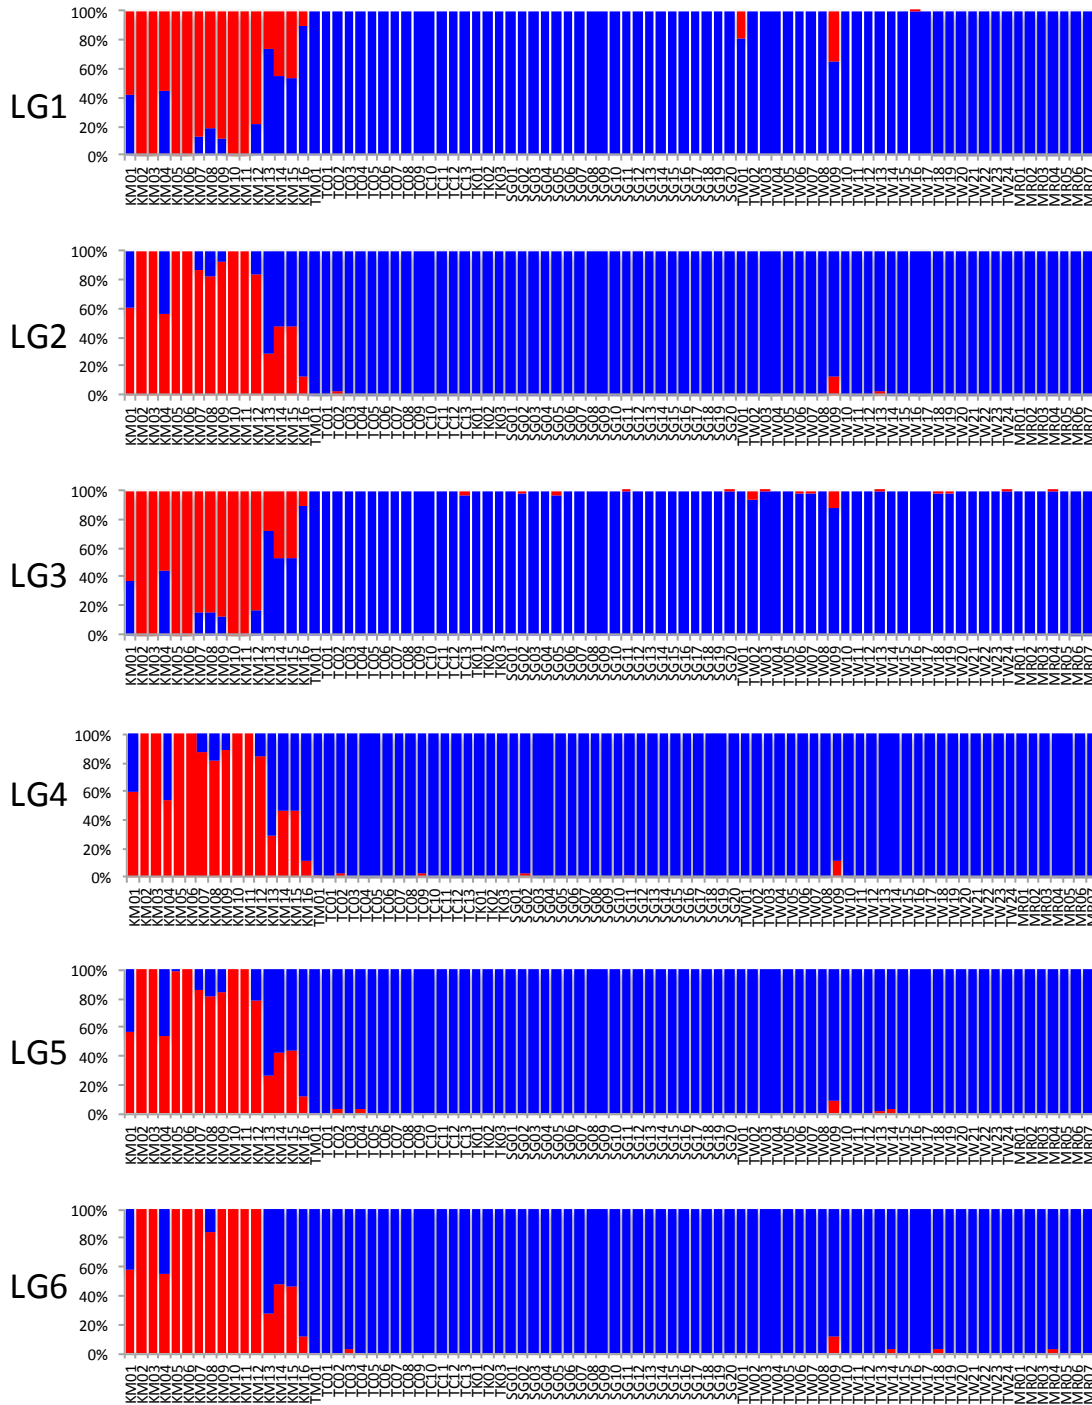

**Figure S9.** Population structure of the 84 Japanese eels by STRUCTURE software based on the SNP sites of each *Anguilla japonica* linkage group.

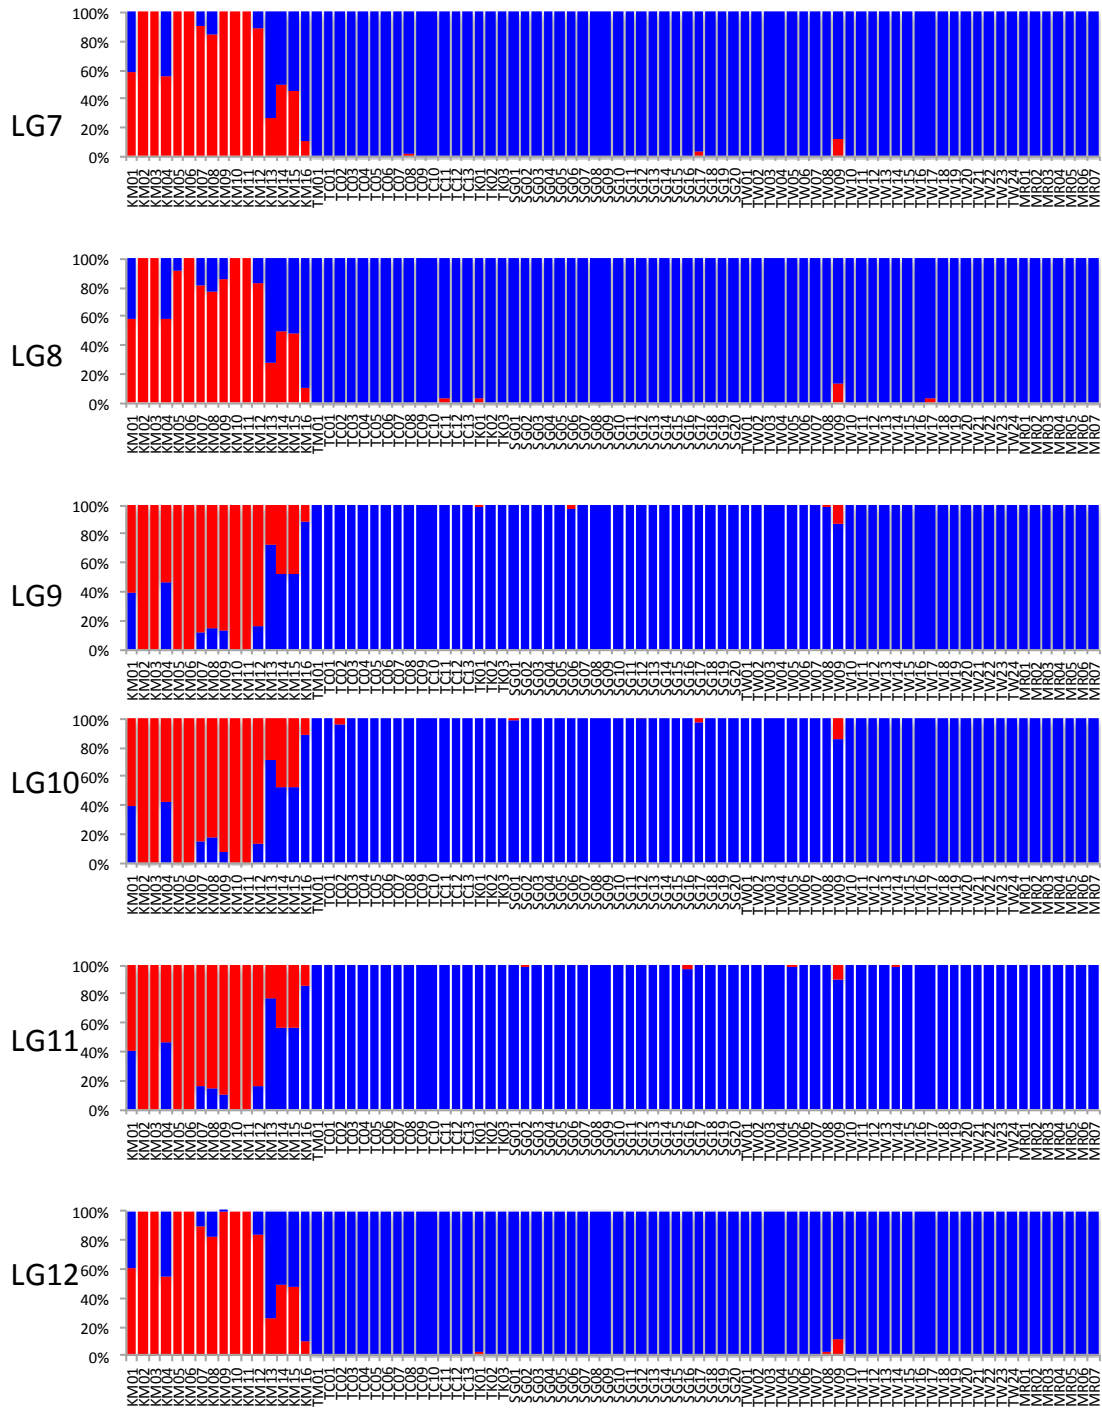

Figure S9. continued.

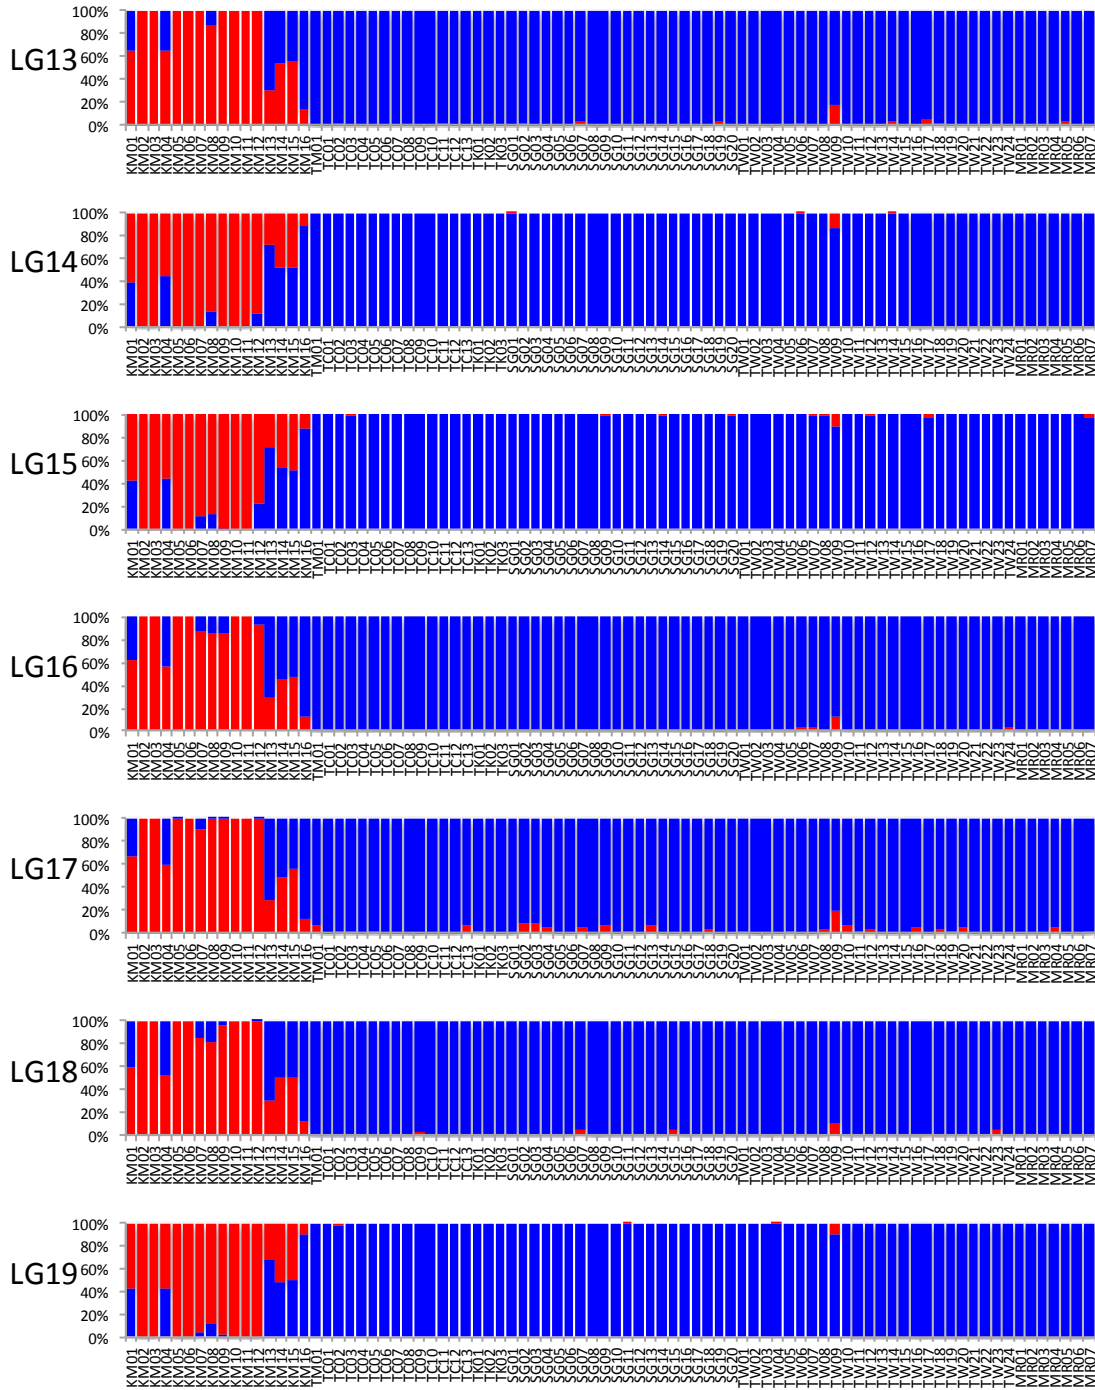

Figure S9. continued.

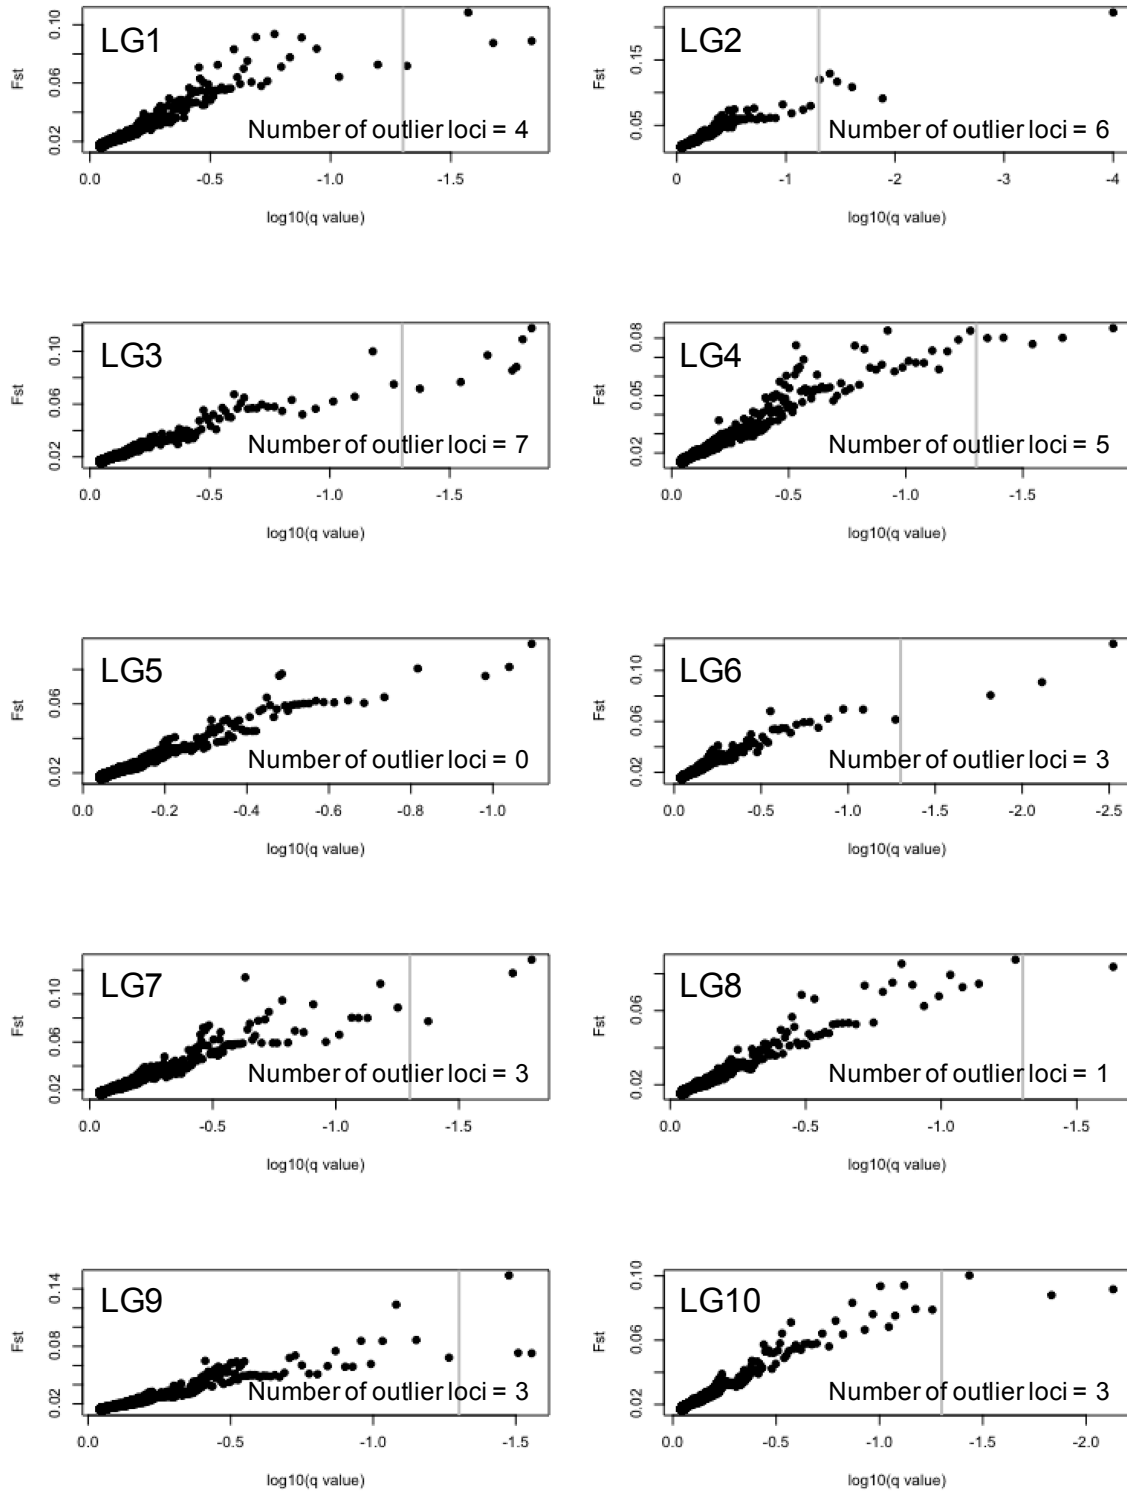

**Figure S10.** Detection of outlier SNPs in each linkage group using BayeScan. Log 10 (q value) is shown on the x-axis, and Fst-values on the y axis. The gray line indicates the Bayes factor threshold delineating ‘very strong’ evidence for selection (FDR > 0.05).

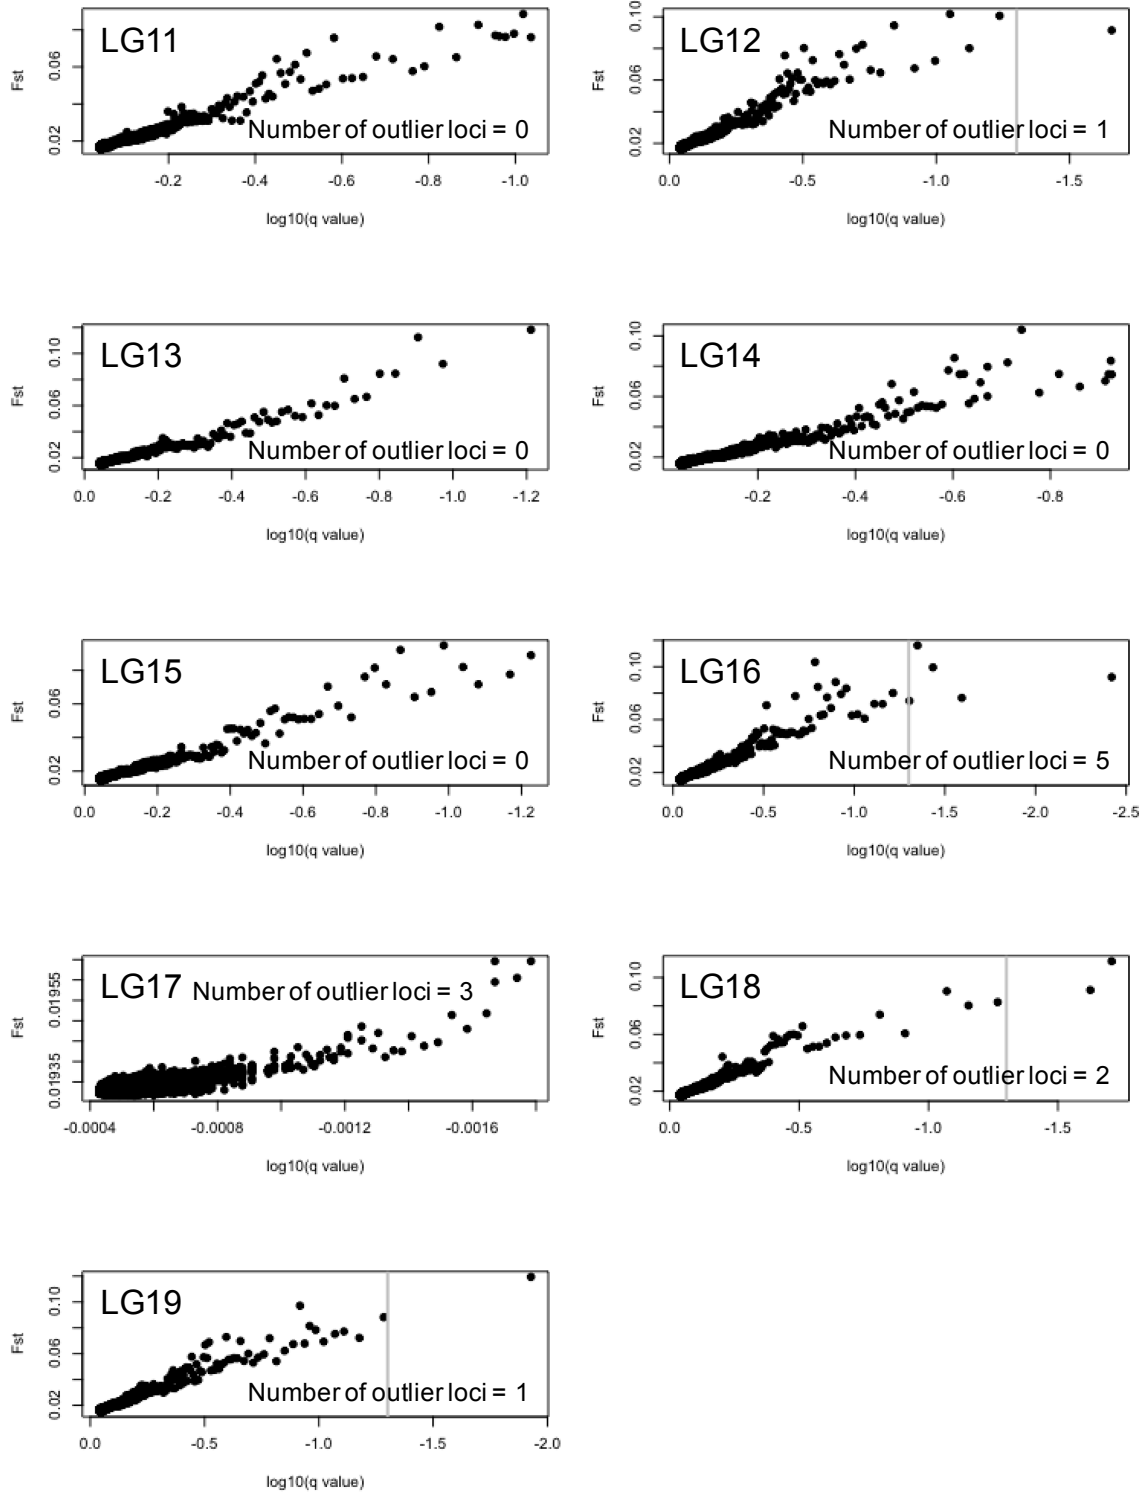

Figure S10. continued.

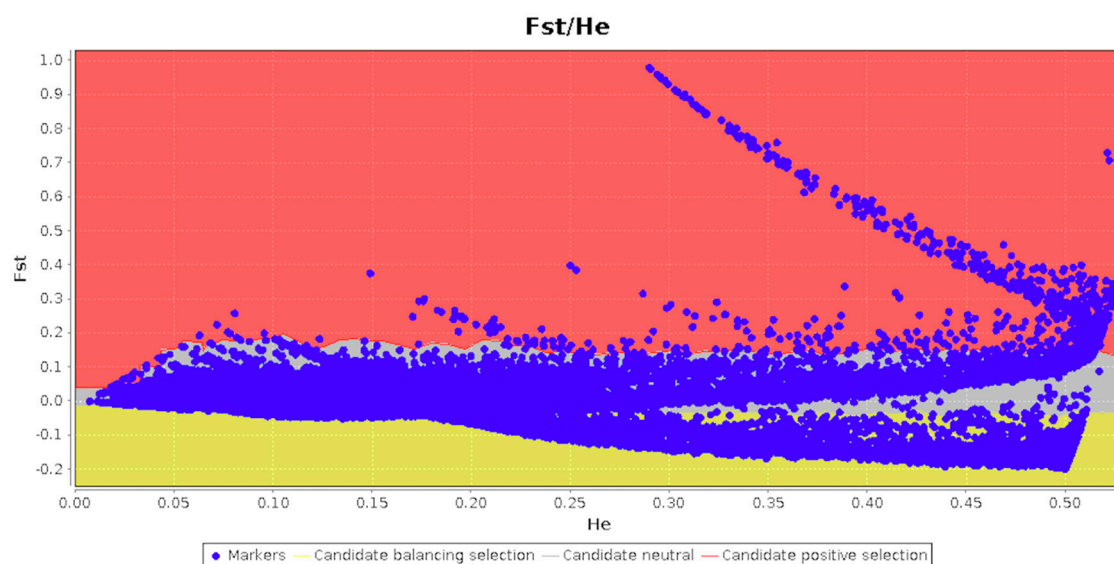

**Figure S11.** Detection of outlier SNPs in the 49,585 SNPs of LG18 using LOSITAN. The figure shows loci under positive selection above 99.5% percentile (red area), neutral loci (gray area) and loci under balancing selection (yellow area). 1,048 SNPs in the red zone are outlier SNPs and thus candidates for positive selection.

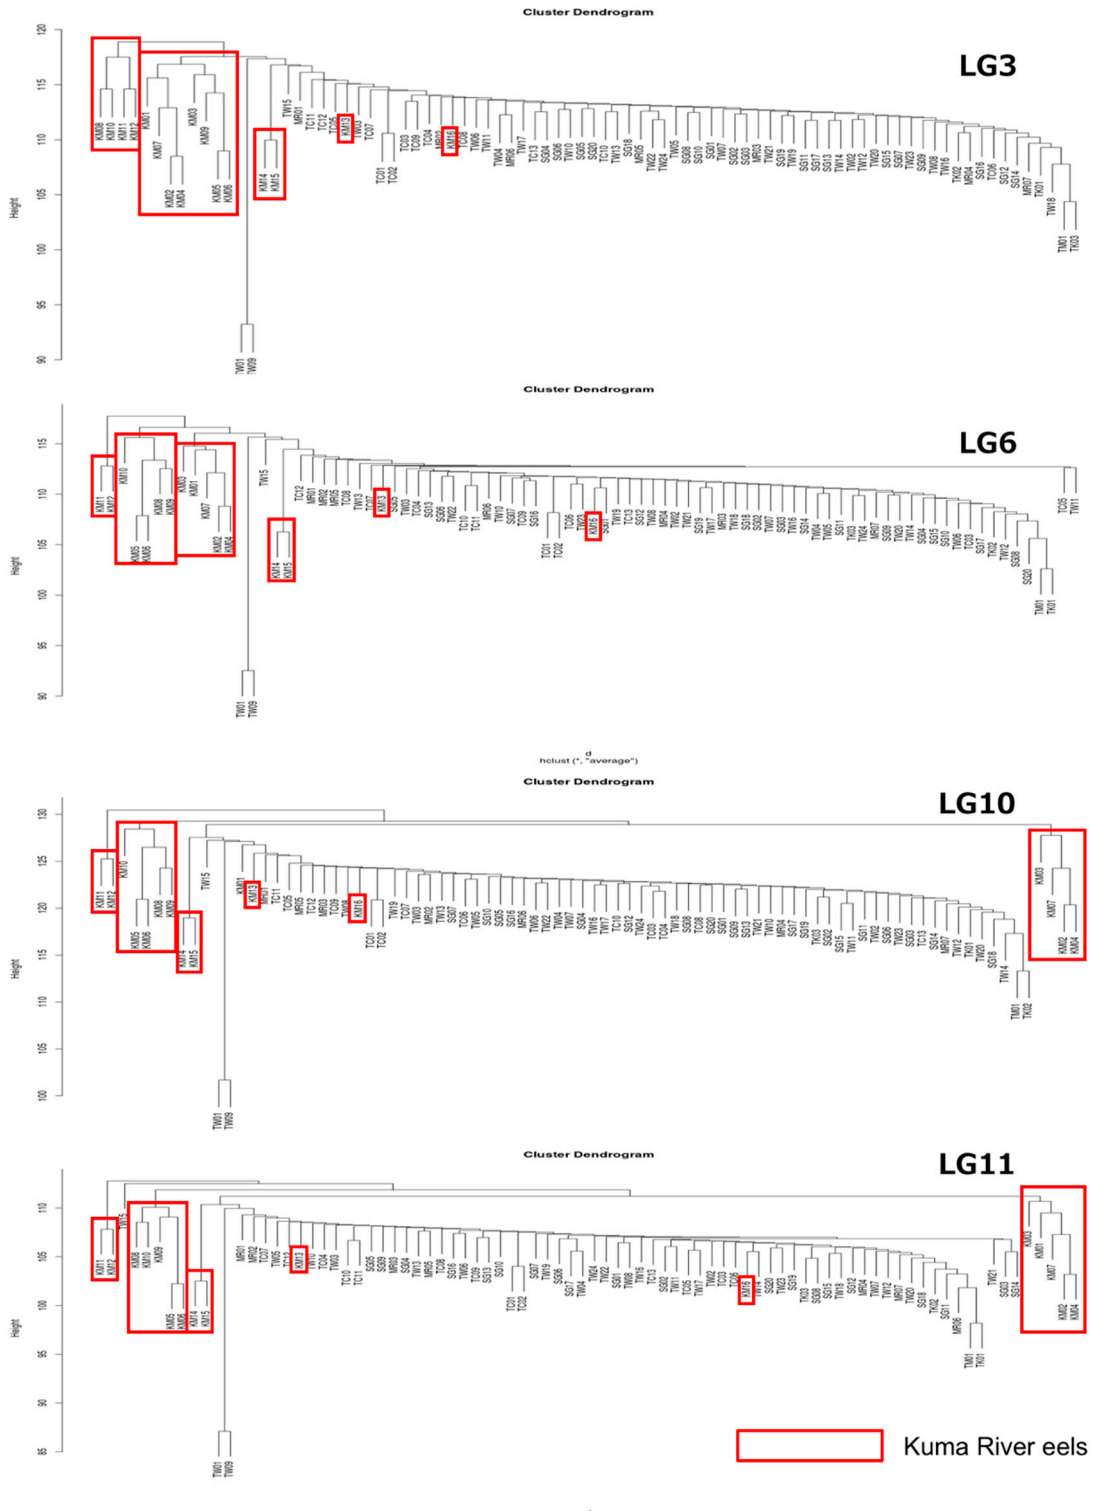

Figure S12. Cluster analysis and PCA of 84 sampled Japanese eels *Anguilla japonica*, based on SNP sites at different linkage groups of *A. japonica* without outlier SNP sites.



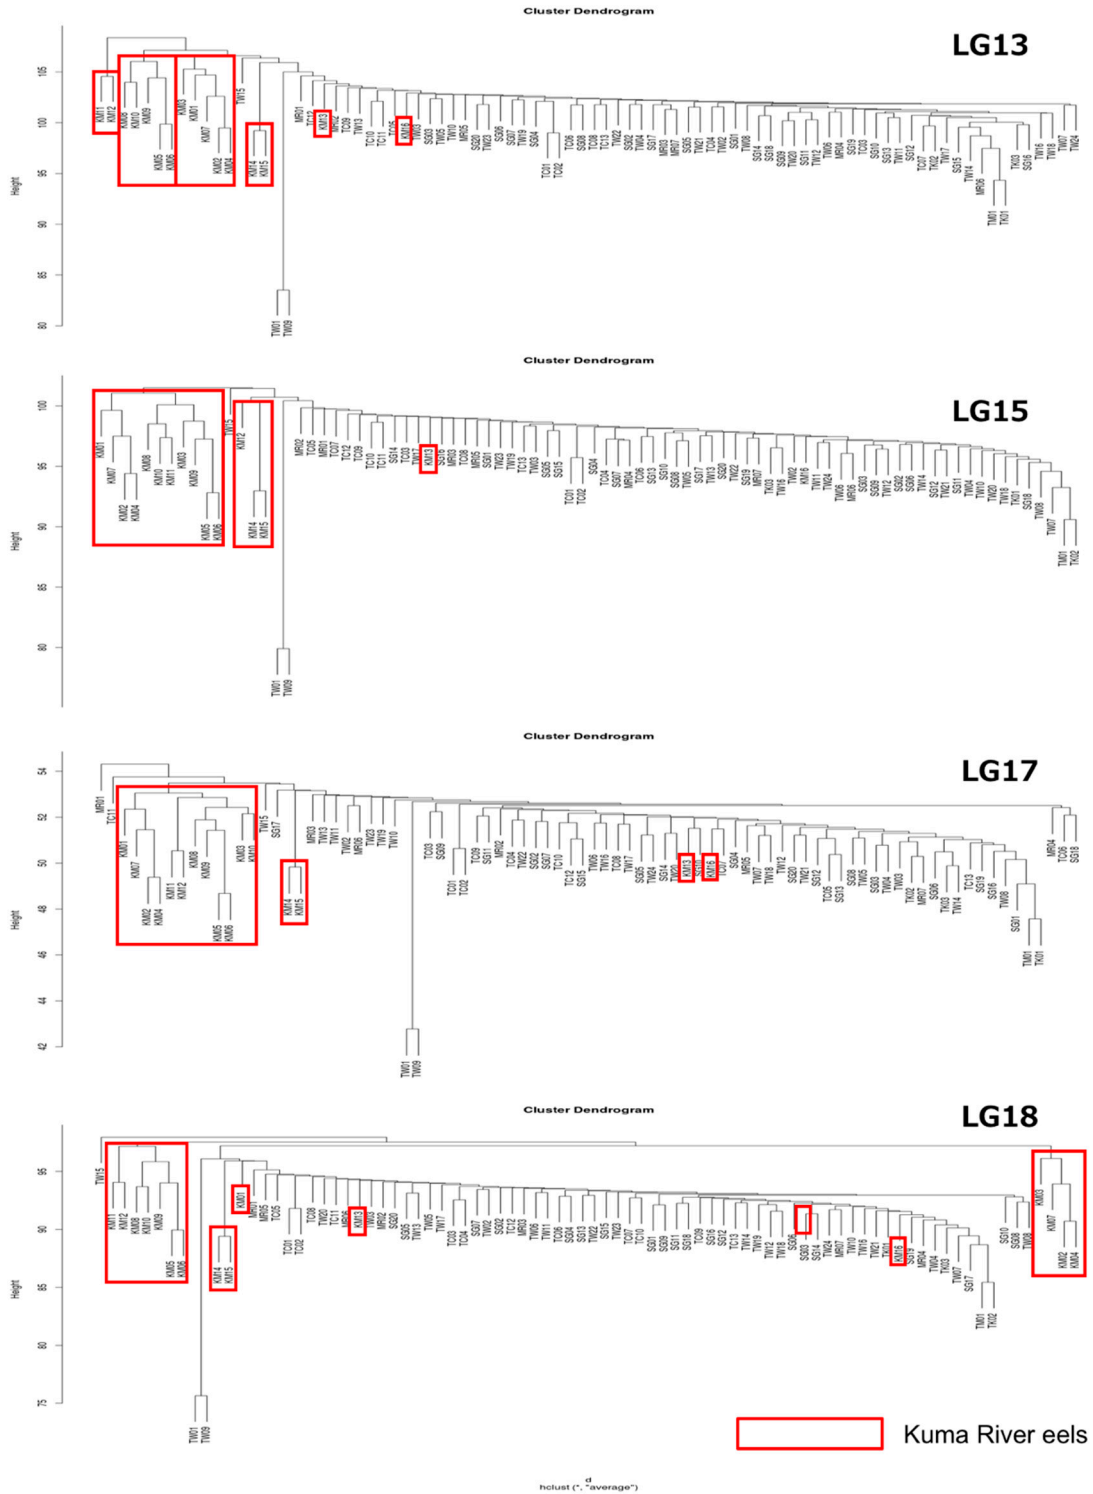

Figure S12. continued.

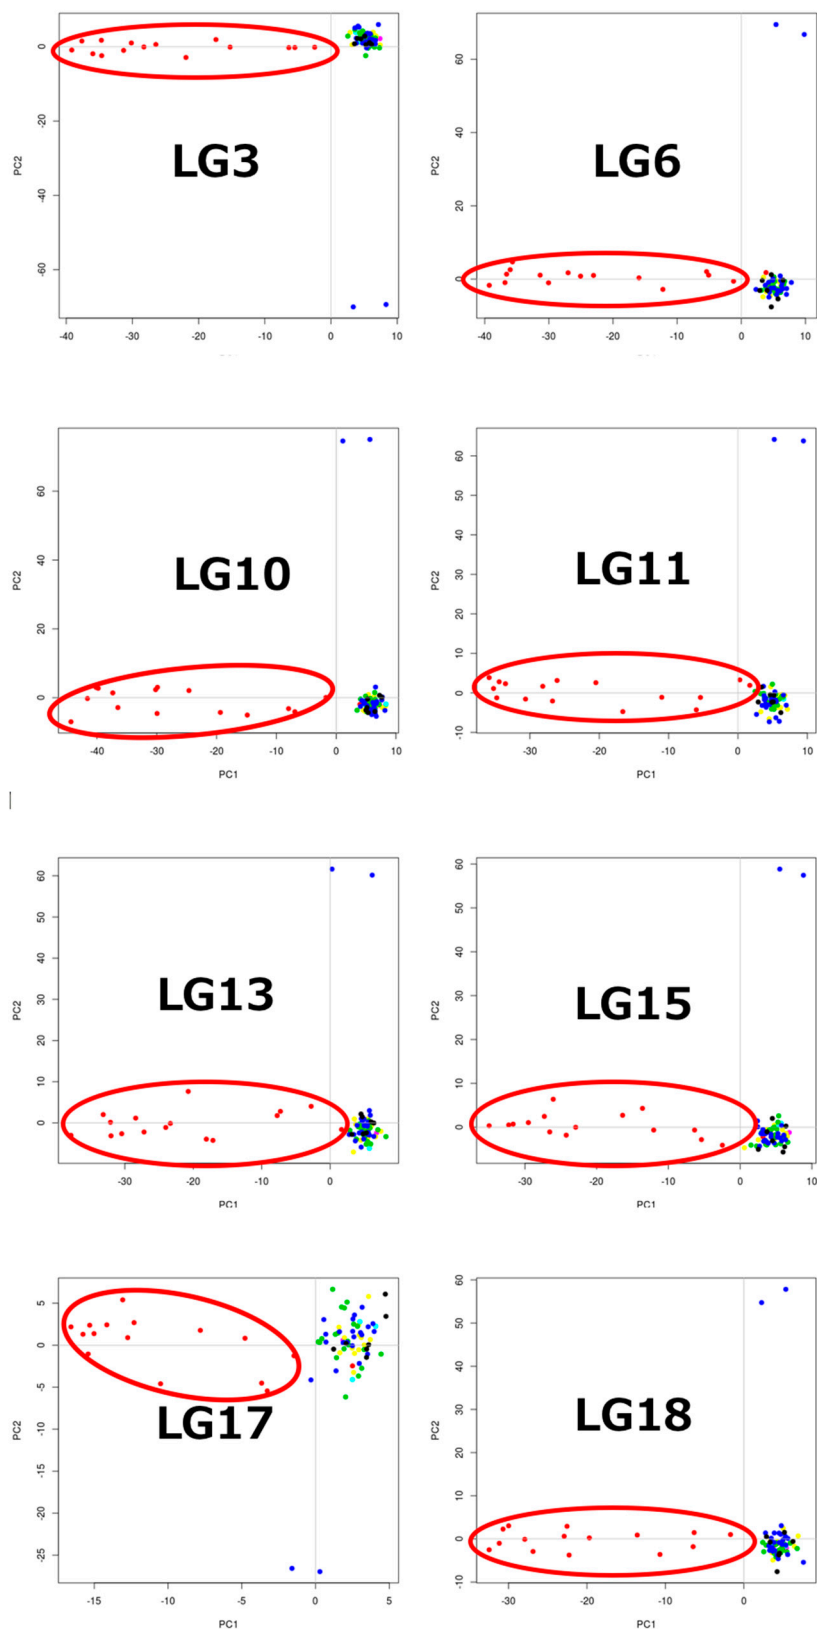

Figure S12. continued.

**Table S1.** Summary of the samples of *A. japonica* used in this study.

| Sampling location                              | Sample ID | Total length (mm) | Body weight (g) | Age  | Life stage           | Sr/Ca ratio of otolith | Environment type | Date       |
|------------------------------------------------|-----------|-------------------|-----------------|------|----------------------|------------------------|------------------|------------|
| Sagami-river, Kanagawa prefecture, Japan       | SG01      | 59.0              | -               | 154d | Glass eel            | -                      | -                | 2013/4/9   |
|                                                | SG02      | -                 | -               | -    | Glass eel            | -                      | -                | 2013/4/9   |
|                                                | SG03      | 59.6              | -               | 184d | Glass eel            | -                      | -                | 2013/4/9   |
|                                                | SG04      | 58.7              | -               | 167d | Glass eel            | -                      | -                | 2013/4/9   |
|                                                | SG05      | 53.2              | -               | 149d | Glass eel            | -                      | -                | 2013/4/9   |
|                                                | SG06      | 54.6              | -               | 124d | Glass eel            | -                      | -                | 2013/4/9   |
|                                                | SG07      | 53.9              | -               | 155d | Glass eel            | -                      | -                | 2013/4/9   |
|                                                | SG08      | 54.4              | -               | 146d | Glass eel            | -                      | -                | 2013/4/9   |
|                                                | SG09      | 62.1              | -               | 175d | Glass eel            | -                      | -                | 2013/4/9   |
|                                                | SG10      | 59.1              | -               | 139d | Glass eel            | -                      | -                | 2013/4/9   |
|                                                | SG11      | 56.4              | -               | 137d | Glass eel            | -                      | -                | 2013/4/9   |
|                                                | SG12      | 57.7              | -               | 143d | Glass eel            | -                      | -                | 2013/4/9   |
|                                                | SG13      | 59.5              | -               | 156d | Glass eel            | -                      | -                | 2013/4/9   |
|                                                | SG14      | 55.4              | -               | 132d | Glass eel            | -                      | -                | 2013/4/9   |
|                                                | SG15      | 58.1              | -               | 155d | Glass eel            | -                      | -                | 2013/4/9   |
|                                                | SG16      | 60.8              | -               | 157d | Glass eel            | -                      | -                | 2013/4/9   |
|                                                | SG17      | 59.6              | -               | 192d | Glass eel            | -                      | -                | 2013/4/9   |
|                                                | SG18      | 55.2              | -               | 166d | Glass eel            | -                      | -                | 2013/4/9   |
|                                                | SG19      | 58.5              | -               | 134d | Glass eel            | -                      | -                | 2013/4/9   |
|                                                | SG20      | 53.5              | -               | 147d | Glass eel            | -                      | -                | 2013/4/9   |
| Yilan City, North Taiwan                       | TW01      | 59.3              | -               | 183d | Glass eel            | -                      | -                | 2012/12/25 |
|                                                | TW02      | -                 | -               | -    | Glass eel            | -                      | -                | 2012/12/25 |
|                                                | TW03      | 57.8              | -               | 104d | Glass eel            | -                      | -                | 2012/12/25 |
|                                                | TW04      | -                 | -               | -    | Glass eel            | -                      | -                | 2012/12/25 |
|                                                | TW05      | 56.0              | -               | 140d | Glass eel            | -                      | -                | 2012/12/25 |
|                                                | TW06      | 56.1              | -               | 156d | Glass eel            | -                      | -                | 2012/12/25 |
|                                                | TW07      | 56.0              | -               | 154d | Glass eel            | -                      | -                | 2012/12/25 |
|                                                | TW08      | 60.1              | -               | 117d | Glass eel            | -                      | -                | 2012/12/25 |
|                                                | TW09      | 55.0              | -               | 185d | Glass eel            | -                      | -                | 2012/12/25 |
|                                                | TW10      | 53.1              | -               | 142d | Glass eel            | -                      | -                | 2012/12/25 |
|                                                | TW11      | 60.4              | -               | 126d | Glass eel            | -                      | -                | 2012/12/25 |
|                                                | TW12      | 57.5              | -               | 109d | Glass eel            | -                      | -                | 2012/12/25 |
|                                                | TW13      | 56.0              | -               | 122d | Glass eel            | -                      | -                | 2012/12/25 |
|                                                | TW14      | 60.0              | -               | 155d | Glass eel            | -                      | -                | 2012/12/25 |
|                                                | TW15      | 59.1              | -               | 181d | Glass eel            | -                      | -                | 2012/12/25 |
|                                                | TW16      | 61.4              | -               | 131d | Glass eel            | -                      | -                | 2012/12/25 |
|                                                | TW17      | 54.9              | -               | 135d | Glass eel            | -                      | -                | 2012/12/25 |
|                                                | TW18      | 59.0              | -               | 124d | Glass eel            | -                      | -                | 2012/12/25 |
|                                                | TW19      | 58.8              | -               | 122d | Glass eel            | -                      | -                | 2012/12/25 |
|                                                | TW20      | 59.9              | -               | 147d | Glass eel            | -                      | -                | 2012/12/25 |
|                                                | TW21      | 55.6              | -               | 140d | Glass eel            | -                      | -                | 2012/12/25 |
|                                                | TW22      | 52.9              | -               | 158d | Glass eel            | -                      | -                | 2012/12/25 |
|                                                | TW23      | -                 | -               | -    | Glass eel            | -                      | -                | 2012/12/25 |
|                                                | TW24      | -                 | -               | -    | Glass eel            | -                      | -                | 2012/12/25 |
| Kuma River estuary, Kumamoto prefecture, Japan | KM01      | 628               | 385             | 5+   | Yellow to silver eel | 4.6                    | Brackish         | 2011/10/15 |
|                                                | KM02      | 661               | 388             | 7+   | Yellow to silver eel | 6.2                    | Sea              | 2011/10/15 |
|                                                | KM03      | 600               | 320             | -    | Yellow to silver eel | -                      | -                | 2011/10/15 |
|                                                | KM04      | 612               | 301             | -    | Yellow to silver eel | 4.9                    | Brackish         | 2011/10/15 |
|                                                | KM05      | 584               | 280             | -    | Yellow to silver eel | -                      | -                | 2011/10/15 |
|                                                | KM06      | 668               | 390             | 6+   | Yellow to silver eel | 5.9                    | Brackish         | 2011/10/15 |
|                                                | KM07      | 641               | 335             | 4+   | Yellow to silver eel | 5.5                    | Brackish         | 2011/10/15 |
|                                                | KM08      | 563               | 231             | 4+   | Yellow to silver eel | 5.6                    | Brackish         | 2011/10/15 |
|                                                | KM09      | 591               | 262             | 5+   | Yellow to silver eel | 6.3                    | Sea              | 2011/10/15 |
|                                                | KM10      | 646               | 408             | 8+   | Yellow to silver eel | 5.6                    | Brackish         | 2011/10/15 |
|                                                | KM11      | 511               | 134             | 7+   | Yellow to silver eel | 6.3                    | Fresh            | 2011/8/17  |
|                                                | KM12      | 481               | 102             | 5+   | Yellow to silver eel | 5.7                    | Brackish         | 2011/8/17  |
|                                                | KM13      | 470               | 101             | 5+   | Yellow to silver eel | 5.9                    | Brackish         | 2011/8/17  |
|                                                | KM14      | 434               | 75              | 6+   | Yellow to silver eel | 4.6                    | Brackish         | 2011/8/17  |
|                                                | KM15      | 395               | 50              | 4+   | Yellow to silver eel | 6.3                    | Sea              | 2011/8/17  |
|                                                | KM16      | 425               | 70              | 4+   | Yellow to silver eel | 6.4                    | Sea              | 2011/8/17  |
| Tama River estuary, Kanagawa Prefecture, Japan | TM01      | 735               | 628             | -    | Yellow to silver eel | 5.7                    | Brackish         | 2011/8/8   |
| Tsuchi River, Kagoshima Prefecture, Japan      | TC01      | 269               | 18              | -    | Yellow to silver eel | 2.0                    | Fresh            | 2013/8/2   |
|                                                | TC02      | 505               | 168             | -    | Yellow to silver eel | 2.1                    | Fresh            | 2013/8/2   |
|                                                | TC03      | 276               | 23              | -    | Yellow to silver eel | 2.1                    | Fresh            | 2013/8/2   |
|                                                | TC04      | 340               | 53              | -    | Yellow to silver eel | 1.8                    | Fresh            | 2013/8/2   |
|                                                | TC05      | 321               | 39              | -    | Yellow to silver eel | 1.6                    | Fresh            | 2013/8/2   |
|                                                | TC06      | 362               | 59              | -    | Yellow to silver eel | 1.9                    | Fresh            | 2013/8/2   |
|                                                | TC07      | 191               | 8               | -    | Yellow to silver eel | 2.2                    | Fresh            | 2013/8/2   |
|                                                | TC08      | 276               | 27              | -    | Yellow to silver eel | 2.8                    | Brackish         | 2013/8/2   |
|                                                | TC09      | 485               | 147             | -    | Yellow to silver eel | 3.1                    | Brackish         | 2013/8/2   |
|                                                | TC10      | 636               | 373             | -    | Yellow to silver eel | 2.6                    | Brackish         | 2013/11/19 |
|                                                | TC11      | 308               | 29              | -    | Yellow to silver eel | 1.9                    | Fresh            | 2013/11/19 |
|                                                | TC12      | 422               | 91              | -    | Yellow to silver eel | 2.4                    | Fresh            | 2013/11/19 |
|                                                | TC13      | 465               | 134             | -    | Yellow to silver eel | 3.0                    | Brackish         | 2013/11/19 |
| Takase River, Wakayama Prefecture, Japan       | TK01      | 225               | 225             | -    | Yellow eel           | 1.9                    | Fresh            | 2014/7/2   |
|                                                | TK02      | 526               | 526             | -    | Yellow eel           | 2.8                    | Brackish         | 2014/9/30  |
|                                                | TK03      | 290               | 290             | -    | Yellow eel           | 2.7                    | Brackish         | 2014/9/30  |
| West Mariana Ridge of the Pacific Ocean        | MR01      | 560               | 118             | 7+   | Silver eel           | -                      | -                | 2013/6/11  |
|                                                | MR02      | 683               | 202             | 6+   | Silver eel           | -                      | -                | 2013/6/11  |
|                                                | MR03      | 616               | 128             | 10+  | Silver eel           | -                      | -                | 2013/6/11  |
|                                                | MR04      | 532               | 185             | 9    | Silver eel           | -                      | -                | 2013/6/12  |
|                                                | MR05      | 729               | 166             | 6    | Silver eel           | -                      | -                | 2013/7/9   |
|                                                | MR06      | 471               | 83              | 6+   | Silver eel           | -                      | -                | 2009/6/12  |
|                                                | MR07      | 739               | 330             | 10+  | Silver eel           | -                      | -                | 2009/6/24  |



**Table S3.** Summary of sequence data obtained for each sample.

\* The depth of coverage was estimated from total residues of sequence / genome size of Japanese eel (1.15 Gb).

| Sample ID    | Raw reads   | Raw residues (bp) | Raw depth of coverage* | High quality reads | High quality residues (bp) | High quality depth of coverage* | Mapped reads | Mapped ratio | Mapped residues (bp) | Actual depth of coverage* |
|--------------|-------------|-------------------|------------------------|--------------------|----------------------------|---------------------------------|--------------|--------------|----------------------|---------------------------|
| Sagami River |             |                   |                        |                    |                            |                                 |              |              |                      |                           |
| SG01         | 16000738    | 15,967,748,832    | 13.9                   | 155,172,057        | 15,470,861,341             | 13.5                            | 137,330,406  | 88.5         | 13,692,026,071       | 11.9                      |
| SG02         | 146,649,316 | 14,612,304,208    | 12.7                   | 147,676,353        | 14,105,180,824             | 12.3                            | 125,376,269  | 88.5         | 12,482,357,908       | 10.9                      |
| SG03         | 152,728,632 | 15,152,582,680    | 13.2                   | 147,643,403        | 14,636,151,388             | 12.7                            | 130,963,523  | 88.7         | 12,982,645,414       | 11.3                      |
| SG04         | 156,085,548 | 15,372,025,872    | 13.4                   | 145,420,748        | 14,319,677,283             | 12.5                            | 128,753,227  | 88.5         | 12,678,415,461       | 11.0                      |
| SG05         | 156,152,544 | 15,357,833,224    | 13.4                   | 146,608,257        | 14,415,182,877             | 12.5                            | 129,997,835  | 88.7         | 12,781,971,517       | 11.1                      |
| SG06         | 152,982,426 | 15,061,394,216    | 13.1                   | 143,462,249        | 14,118,501,391             | 12.3                            | 127,186,168  | 88.7         | 12,516,728,982       | 10.9                      |
| SG07         | 146,061,748 | 14,398,449,240    | 12.5                   | 136,094,494        | 13,415,340,376             | 11.7                            | 120,717,426  | 88.7         | 11,899,565,600       | 10.3                      |
| SG08         | 211,785,968 | 21,178,596,800    | 18.4                   | 196,928,342        | 19,600,027,958             | 17.1                            | 173,672,628  | 88.2         | 17,338,330,721       | 15.1                      |
| SG09         | 188,851,900 | 18,885,190,000    | 16.4                   | 183,319,354        | 18,313,452,521             | 15.9                            | 160,759,084  | 87.7         | 16,057,948,214       | 14.0                      |
| SG10         | 139,112,740 | 13,854,568,744    | 12.0                   | 133,900,839        | 13,253,599,264             | 11.5                            | 117,908,468  | 88.5         | 11,731,995,057       | 10.2                      |
| SG11         | 187,193,148 | 18,719,314,800    | 16.3                   | 182,394,414        | 18,220,813,533             | 15.8                            | 160,431,495  | 88.0         | 16,026,704,697       | 13.9                      |
| SG12         | 269,351,798 | 26,841,294,944    | 23.3                   | 244,103,238        | 24,262,546,850             | 21.1                            | 215,544,903  | 88.3         | 21,424,002,197       | 18.6                      |
| SG13         | 166,493,424 | 15,989,278,160    | 13.9                   | 153,082,339        | 14,940,919,442             | 13.0                            | 135,693,865  | 88.6         | 13,243,794,934       | 11.5                      |
| SG14         | 211,395,626 | 22,970,603,776    | 20.0                   | 214,473,973        | 21,238,705,443             | 18.5                            | 188,630,672  | 88.0         | 18,679,521,921       | 16.2                      |
| SG15         | 252,100,734 | 24,975,986,968    | 21.7                   | 229,600,841        | 22,682,835,943             | 19.7                            | 202,567,316  | 88.2         | 20,012,127,030       | 17.4                      |
| SG16         | 199,201,706 | 19,864,788,240    | 17.0                   | 187,755,988        | 18,411,057,663             | 16.0                            | 166,155,098  | 88.5         | 16,292,908,273       | 14.2                      |
| SG17         | 226,913,822 | 22,428,656,096    | 19.5                   | 201,530,727        | 19,847,808,774             | 17.3                            | 171,426,210  | 88.0         | 17,473,868,824       | 15.2                      |
| SG18         | 410,309,516 | 39,389,713,536    | 34.3                   | 393,382,895        | 37,694,861,475             | 32.8                            | 344,975,938  | 87.7         | 33,056,394,572       | 28.7                      |
| SG19         | 207,023,090 | 20,396,684,400    | 17.7                   | 182,409,425        | 17,944,832,809             | 15.6                            | 160,655,954  | 88.0         | 15,761,792,105       | 13.7                      |
| SG20         | 167,144,838 | 16,045,904,448    | 14.0                   | 157,190,639        | 15,063,685,652             | 13.1                            | 138,765,687  | 88.3         | 13,297,722,501       | 11.6                      |
| Taiwan       |             |                   |                        |                    |                            |                                 |              |              |                      |                           |
| TW01         | 142,676,022 | 14,172,379,256    | 12.3                   | 137,894,526        | 13,677,329,344             | 11.9                            | 131,613,815  | 62.1         | 8,497,314,117        | 7.4                       |
| TW02         | 147,687,236 | 14,640,860,264    | 12.7                   | 143,831,630        | 14,248,494,720             | 12.4                            | 127,110,958  | 88.4         | 12,592,082,937       | 10.9                      |
| TW03         | 116,041,826 | 11,604,182,600    | 10.1                   | 113,869,682        | 11,376,975,919             | 9.9                             | 100,449,752  | 88.2         | 10,036,160,543       | 8.7                       |
| TW04         | 172,105,420 | 17,210,542,000    | 15.0                   | 166,756,633        | 16,655,805,039             | 14.5                            | 147,990,790  | 88.7         | 14,781,455,475       | 12.9                      |
| TW05         | 158,991,570 | 15,864,480,088    | 13.8                   | 154,630,367        | 15,411,891,872             | 13.4                            | 130,974,714  | 84.7         | 13,054,130,807       | 11.4                      |
| TW06         | 214,480,772 | 21,445,077,200    | 18.6                   | 200,814,958        | 20,043,997,904             | 17.4                            | 142,507,043  | 71.0         | 14,224,094,159       | 12.4                      |
| TW07         | 251,595,362 | 25,159,536,200    | 21.9                   | 239,545,775        | 23,922,961,490             | 20.8                            | 212,048,979  | 88.5         | 21,176,911,004       | 18.4                      |
| TW08         | 146,160,382 | 14,485,151,232    | 12.6                   | 140,651,629        | 13,925,887,740             | 12.1                            | 124,575,884  | 88.6         | 12,334,231,662       | 10.7                      |
| TW09         | 227,364,140 | 22,736,414,000    | 19.8                   | 207,209,822        | 20,686,478,530             | 18.0                            | 162,909,823  | 78.6         | 16,263,855,271       | 14.1                      |
| TW10         | 175,045,178 | 17,504,517,800    | 15.2                   | 170,814,405        | 17,063,974,170             | 14.8                            | 146,136,299  | 85.6         | 14,598,686,987       | 12.7                      |
| TW11         | 183,201,526 | 18,320,152,600    | 15.9                   | 178,971,391        | 17,879,170,416             | 15.5                            | 157,824,820  | 88.2         | 15,766,636,427       | 13.7                      |
| TW12         | 241,000,556 | 23,813,532,840    | 20.7                   | 216,570,603        | 21,328,167,989             | 18.5                            | 191,088,551  | 88.2         | 18,818,660,797       | 16.4                      |
| TW13         | 150,101,364 | 14,409,730,944    | 12.5                   | 140,241,268        | 13,430,764,214             | 11.7                            | 120,657,600  | 86.0         | 11,555,256,162       | 10.0                      |
| TW14         | 301,106,610 | 29,806,701,688    | 25.9                   | 278,993,434        | 27,550,825,293             | 24.0                            | 186,322,848  | 66.8         | 18,399,530,626       | 16.0                      |
| TW15         | 95,483,190  | 9,166,866,240     | 8.0                    | 92,987,838         | 8,918,113,967              | 7.8                             | 78,479,290   | 84.4         | 7,526,653,671        | 6.5                       |
| TW16         | 188,967,656 | 18,367,288,448    | 16.1                   | 182,791,176        | 17,945,647,012             | 15.6                            | 161,493,152  | 88.3         | 15,834,699,138       | 13.8                      |
| TW17         | 194,682,324 | 19,312,818,384    | 16.8                   | 181,350,875        | 17,951,341,114             | 15.6                            | 160,435,262  | 88.5         | 15,880,971,707       | 13.8                      |
| TW18         | 241,063,108 | 23,868,510,736    | 20.8                   | 220,737,468        | 21,791,716,807             | 18.9                            | 190,071,481  | 86.1         | 18,764,299,168       | 16.3                      |
| TW19         | 186,474,174 | 18,656,595,280    | 16.2                   | 171,641,569        | 16,939,644,195             | 14.7                            | 138,113,663  | 80.5         | 13,630,709,177       | 11.9                      |
| TW20         | 178,930,022 | 17,580,748,976    | 15.3                   | 171,598,755        | 16,834,374,012             | 14.6                            | 152,172,027  | 88.7         | 14,928,551,298       | 13.0                      |
| TW21         | 237,709,984 | 23,487,841,352    | 20.4                   | 210,850,215        | 20,755,886,176             | 18.0                            | 169,041,859  | 80.2         | 16,640,313,051       | 14.5                      |
| TW22         | 164,151,692 | 15,758,562,432    | 13.7                   | 151,717,823        | 14,542,858,701             | 12.6                            | 133,444,112  | 88.0         | 12,791,238,544       | 11.1                      |
| TW23         | 192,338,700 | 18,888,833,648    | 16.4                   | 180,176,183        | 17,659,658,209             | 15.4                            | 136,617,664  | 88.0         | 15,546,637,105       | 13.5                      |
| TW24         | 173,835,938 | 17,061,433,752    | 14.8                   | 166,874,885        | 16,356,040,155             | 14.2                            | 147,871,789  | 88.6         | 14,493,474,669       | 12.6                      |

| Sampling location  | Sample ID     | Raw reads   | Raw residues (bp) | Raw depth of coverage* | High quality reads | High quality residues (bp) | High quality depth of coverage* | Mapped reads | Mapped ratio | Mapped residues (bp) | Actual depth of coverage* |      |
|--------------------|---------------|-------------|-------------------|------------------------|--------------------|----------------------------|---------------------------------|--------------|--------------|----------------------|---------------------------|------|
| Kuma River estuary | KM01          | 158,288,906 | 15,744,270,726    | 13.7                   | 138,387,602        | 13,681,566,795             | 11.9                            | 121,178,822  | 88.3         | 12,079,100,223       | 10.5                      |      |
|                    | KM02          | 168,910,616 | 16,720,555,966    | 14.5                   | 145,734,939        | 14,347,593,388             | 12.5                            | 128,230,942  | 88.0         | 12,624,326,247       | 11.0                      |      |
|                    | KM03          | 195,365,538 | 19,542,109,858    | 17.0                   | 165,987,494        | 16,497,823,854             | 14.4                            | 146,680,648  | 88.4         | 14,623,062,662       | 12.7                      |      |
|                    | KM04          | 273,704,688 | 27,377,151,474    | 23.9                   | 254,536,358        | 25,448,112,544             | 22.1                            | 223,447,485  | 87.8         | 22,339,899,850       | 19.4                      |      |
|                    | KM05          | 168,350,850 | 16,333,093,450    | 14.6                   | 152,142,574        | 15,041,077,078             | 13.1                            | 132,965,974  | 87.4         | 13,145,245,179       | 11.4                      |      |
|                    | KM06          | 187,680,176 | 18,955,697,776    | 16.5                   | 164,290,448        | 16,481,695,975             | 14.3                            | 140,528,756  | 85.5         | 14,097,911,719       | 12.3                      |      |
|                    | KM07          | 148,741,746 | 14,759,891,916    | 12.8                   | 133,428,333        | 13,184,979,686             | 11.5                            | 116,979,701  | 87.7         | 11,559,576,191       | 10.1                      |      |
|                    | KM08          | 146,955,038 | 14,668,017,348    | 12.8                   | 131,815,747        | 13,103,215,080             | 11.4                            | 115,891,661  | 87.9         | 11,520,272,764       | 10.0                      |      |
|                    | KM09          | 160,058,026 | 16,040,451,266    | 13.9                   | 144,130,313        | 14,390,895,830             | 12.5                            | 125,381,574  | 87.1         | 12,538,870,637       | 10.9                      |      |
|                    | KM10          | 204,214,514 | 20,625,665,914    | 17.9                   | 182,640,777        | 18,333,461,016             | 16.0                            | 157,919,889  | 86.5         | 15,869,273,960       | 13.8                      |      |
|                    | KM11          | 149,597,042 | 15,014,923,022    | 13.1                   | 134,932,711        | 13,469,951,736             | 11.7                            | 116,431,484  | 86.2         | 11,614,054,062       | 10.1                      |      |
|                    | KM12          | 192,884,606 | 19,334,384,986    | 16.8                   | 171,250,612        | 17,101,998,930             | 14.9                            | 150,667,904  | 88.0         | 15,046,499,997       | 13.1                      |      |
|                    | KM13          | 180,578,944 | 18,066,174,774    | 15.7                   | 162,673,848        | 16,224,202,220             | 14.1                            | 141,778,680  | 87.2         | 14,140,169,313       | 12.3                      |      |
|                    | KM14          | 165,943,924 | 16,492,030,554    | 14.3                   | 149,183,948        | 14,945,605,966             | 13.0                            | 130,801,337  | 87.7         | 13,103,991,876       | 11.4                      |      |
|                    | KM15          | 164,841,208 | 16,493,656,928    | 14.3                   | 147,384,063        | 14,696,561,836             | 12.8                            | 127,694,166  | 86.6         | 12,733,162,382       | 11.1                      |      |
|                    | KM16          | 183,096,344 | 18,387,552,612    | 16.0                   | 170,223,481        | 17,057,565,402             | 14.8                            | 150,423,946  | 88.4         | 15,073,515,603       | 13.1                      |      |
| Tama River estuary | TM01          | 167,227,406 | 16,684,654,744    | 14.5                   | 149,314,565        | 14,868,396,395             | 12.9                            | 129,195,977  | 86.5         | 12,865,034,290       | 11.2                      |      |
|                    | TC01          | 149,706,638 | 15,021,817,278    | 13.1                   | 136,790,787        | 13,679,441,455             | 11.9                            | 118,787,975  | 86.8         | 11,879,112,513       | 10.3                      |      |
|                    | TC02          | 171,141,656 | 17,998,407,856    | 15.5                   | 161,082,232        | 16,132,461,560             | 14.0                            | 139,438,594  | 88.0         | 13,964,840,999       | 12.1                      |      |
|                    | TC03          | 163,548,752 | 16,426,050,538    | 14.3                   | 154,675,701        | 15,499,482,777             | 13.5                            | 136,095,685  | 88.0         | 13,637,647,750       | 11.9                      |      |
|                    | TC04          | 170,794,260 | 16,986,468,720    | 14.8                   | 157,174,035        | 15,583,486,649             | 13.6                            | 136,920,929  | 87.1         | 13,575,432,285       | 11.8                      |      |
|                    | TC05          | 149,683,016 | 14,999,963,036    | 13.0                   | 134,031,405        | 13,373,334,493             | 11.6                            | 115,530,242  | 86.2         | 11,527,332,496       | 10.0                      |      |
|                    | TC06          | 173,818,164 | 17,452,733,262    | 15.2                   | 162,929,634        | 16,316,137,063             | 14.2                            | 143,035,039  | 87.8         | 14,323,847,933       | 12.5                      |      |
|                    | TC07          | 169,555,642 | 17,125,119,842    | 14.9                   | 151,133,441        | 15,225,149,411             | 13.2                            | 130,998,805  | 86.7         | 13,196,790,635       | 11.5                      |      |
|                    | TC08          | 165,786,960 | 16,615,148,580    | 14.4                   | 146,907,351        | 14,662,694,655             | 12.8                            | 126,545,670  | 86.1         | 12,630,413,022       | 11.0                      |      |
|                    | TC09          | 171,977,990 | 17,369,776,990    | 15.1                   | 155,530,889        | 15,646,687,897             | 13.6                            | 134,744,936  | 86.6         | 13,555,583,543       | 11.8                      |      |
|                    | TC10          | 180,419,636 | 18,222,383,236    | 15.8                   | 163,083,846        | 16,412,364,447             | 14.3                            | 141,676,542  | 86.9         | 14,257,985,067       | 12.4                      |      |
|                    | TC11          | 139,489,716 | 14,011,410,796    | 12.2                   | 122,621,626        | 12,276,732,777             | 10.7                            | 106,502,345  | 86.9         | 10,662,889,348       | 9.3                       |      |
|                    | TC12          | 141,122,980 | 14,055,167,360    | 12.2                   | 128,388,439        | 12,761,830,543             | 11.1                            | 111,146,256  | 86.6         | 11,047,954,966       | 9.6                       |      |
|                    | TC13          | 180,002,980 | 17,690,189,528    | 15.4                   | 163,108,603        | 16,008,092,873             | 13.9                            | 141,972,909  | 87.0         | 13,933,786,227       | 12.1                      |      |
|                    | Takeasa River | TK01        | 254,417,460       | 25,441,746,000         | 22.1               | 237,977,471                | 23,689,880,458                  | 20.6         | 211,686,683  | 89.0                 | 21,072,718,328            | 18.3 |
|                    |               | TK02        | 251,669,932       | 24,975,015,718         | 21.7               | 243,356,024                | 24,123,799,421                  | 21.0         | 214,306,633  | 88.1                 | 21,244,143,227            | 18.5 |
| TK03               |               | 166,778,212 | 16,407,954,888    | 14.3                   | 153,061,359        | 14,943,302,743             | 13.0                            | 136,834,709  | 89.4         | 13,359,111,931       | 11.6                      |      |
| Mariana Ridge      | MR01          | 111,119,606 | 11,111,960,600    | 9.7                    | 107,285,045        | 10,715,949,315             | 9.3                             | 93,485,061   | 87.1         | 9,338,039,606        | 8.1                       |      |
|                    | MR02          | 100,751,136 | 10,075,113,600    | 8.8                    | 96,918,391         | 9,681,976,662              | 8.4                             | 86,466,069   | 89.2         | 8,637,808,093        | 7.5                       |      |
|                    | MR03          | 145,533,522 | 14,553,352,200    | 12.7                   | 138,626,007        | 13,847,300,788             | 12.0                            | 123,297,729  | 88.9         | 12,316,164,743       | 10.7                      |      |
|                    | MR04          | 192,853,338 | 19,285,333,800    | 16.8                   | 183,513,533        | 18,329,271,156             | 15.9                            | 162,302,834  | 88.4         | 16,210,753,535       | 14.1                      |      |
|                    | MR05          | 128,008,122 | 12,800,812,200    | 11.1                   | 122,894,913        | 12,276,066,067             | 10.7                            | 108,208,537  | 88.0         | 10,809,032,830       | 9.4                       |      |
|                    | MR06          | 116,336,394 | 11,633,639,400    | 10.1                   | 110,700,805        | 11,057,128,222             | 9.6                             | 98,856,186   | 89.3         | 9,874,052,173        | 8.6                       |      |
|                    | MR07          | 165,575,126 | 16,557,512,600    | 14.4                   | 158,627,732        | 15,846,015,023             | 13.8                            | 142,316,884  | 89.7         | 14,216,653,377       | 12.4                      |      |

Table S3. continued.

**Table S4.** Comparison of mapping rates with eels of different species.

|                    | Input reads | <i>Anguilla japonica</i> |              | <i>Anguilla anguilla</i> |              | <i>Anguilla rostrata</i> |              |
|--------------------|-------------|--------------------------|--------------|--------------------------|--------------|--------------------------|--------------|
|                    |             | Mapped reads             | Mapped ratio | Mapped reads             | Mapped ratio | Mapped reads             | Mapped ratio |
| TW22               | 151,717,823 | 133,444,112              | 88.0         | 127,338,128              | 83.9         | 100,955,294              | 66.5         |
| SG11               | 182,394,414 | 160,431,495              | 88.0         | 153,354,456              | 84.1         | 121,497,095              | 66.6         |
| KM02               | 145,734,939 | 128,230,942              | 88.0         | 122,405,896              | 84.0         | 96,899,548               | 66.5         |
| KM08               | 131,815,747 | 115,891,661              | 87.9         | 110,338,498              | 83.7         | 87,629,938               | 66.5         |
| KM12               | 171,250,612 | 150,667,904              | 88.0         | 143,765,213              | 84.0         | 113,996,771              | 66.6         |
| TC03               | 154,675,701 | 136,095,685              | 88.0         | 129,674,464              | 83.8         | 103,105,194              | 66.7         |
| TK02               | 243,356,024 | 214,306,633              | 88.1         | 204,602,758              | 84.1         | 162,066,083              | 66.6         |
| MR05               | 122,894,913 | 108,208,537              | 88.0         | 103,527,744              | 84.2         | 82,206,808               | 66.9         |
| <i>A. anguilla</i> | 67,974,339  | 59,372,788               | 87.3         | 63,317,574               | 93.1         | 49,979,926               | 73.5         |
| <i>A. rostrata</i> | 286,873,752 | 239,503,053              | 83.5         | 256,373,371              | 89.4         | 212,328,050              | 74.0         |





**Table S6.** The number of SNPs and the outlier SNPs site in each linkage groups.

| Linkage group | SNPs    | Outlier SNPs site |         | LOSITAN Outlier |         |         |
|---------------|---------|-------------------|---------|-----------------|---------|---------|
|               |         | BayeScan          | LOSITAN | Ave. Fst        | Min Fst | Max Fst |
| LG1           | 124,545 | 4                 | -       | -               | -       | -       |
| LG2           | 152,882 | 6                 | -       | -               | -       | -       |
| LG3           | 76,871  | 7                 | 2,325   | 0.22            | 0.02    | 1       |
| LG4           | 138,236 | 5                 | -       | -               | -       | -       |
| LG5           | 110,785 | 0                 | -       | -               | -       | -       |
| LG6           | 75,841  | 3                 | 2,335   | 0.21            | 0.02    | 1       |
| LG7           | 160,288 | 3                 | -       | -               | -       | -       |
| LG8           | 91,643  | 1                 | -       | -               | -       | -       |
| LG9           | 161,375 | 3                 | -       | -               | -       | -       |
| LG10          | 89,537  | 3                 | 1,952   | 0.28            | 0.102   | 0.979   |
| LG11          | 66,100  | 0                 | 1,785   | 0.25            | 0.096   | 0.979   |
| LG12          | 100,914 | 1                 | -       | -               | -       | -       |
| LG13          | 61,450  | 0                 | 1,476   | 0.26            | 0.015   | 1       |
| LG14          | 96,526  | 0                 | -       | -               | -       | -       |
| LG15          | 56,396  | 0                 | 2,283   | 0.16            | 0.04    | 0.979   |
| LG16          | 93,193  | 5                 | -       | -               | -       | -       |
| LG17          | 13,825  | 3                 | 399     | 0.27            | 0.02    | 1       |
| LG18          | 49,585  | 2                 | 1,048   | 0.29            | 0.102   | 0.979   |
| LG19          | 116,031 | 1                 | -       | -               | -       | -       |

**Table S7.** Fixation index (Fst) values between each set of six regional populations of the Japanese eel *Anguilla japonica*, based on 32,312,607 SNP sites. This table corresponds to Figure 4.

|    | SG | TW    | KM    | TC    | TK    | MR     |
|----|----|-------|-------|-------|-------|--------|
| SG | -  | 0.000 | 0.014 | 0.001 | 0.000 | 0.001  |
| TW |    | -     | 0.014 | 0.001 | 0.000 | 0.001  |
| KM |    |       | -     | 0.014 | 0.011 | 0.013  |
| TC |    |       |       | -     | 0.001 | 0.001  |
| TK |    |       |       |       | -     | -0.001 |
| MR |    |       |       |       |       | -      |
